# Supplementary material for: Virtual Screening Guided Design, Synthesis and Bioactivity Study of Benzisoselenazolones (BISAs) on Inhibition of c-Met and Its Downstream Signalling Pathways
Source: PubMed Central journal article supplement (PMC6566228; doi:10.3390/ijms20102489), 2019-05-20
Supplement: ijms-20-02489-s001.pdf [file ijms-20-02489-s001.pdf]

Supplementary Material

**Virtual screening guided design, synthesis, and bioactivity study of BISAs on inhibition of c-Met and its downstream signalling pathways**

**Table S1.** Structure and docking results of 300 BISAs compounds and Ebselen.

| Number  | Structure in MOE                                                                    | Scores  |         |
|---------|-------------------------------------------------------------------------------------|---------|---------|
|         |                                                                                     | 3U6I    | 3ZZE    |
| Ebselen | 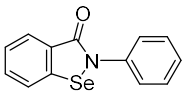   | -6.1458 | -5.9608 |
| 1       |    | -8.9999 | -8.3928 |
| 2       |   | -6.3305 | -6.1496 |
| 3       |  | -8.602  | -8.735  |
| 4       |  | -6.4521 | -6.2689 |
| 5       |  | -8.8676 | -8.8082 |
| 6       |  | -6.7571 | -6.4946 |
| 7       |  | -9.379  | -9.8461 |
| 8       |  | -6.9434 | -7.1115 |
| 9       |  | -8.8069 | -8.9007 |

|    |  |         |         |
|----|--|---------|---------|
| 10 |  | -6.7991 | -6.7491 |
| 11 |  | -8.9715 | -9.1441 |
| 12 |  | -7.1323 | -6.9518 |
| 13 |  | -9.4051 | -9.3815 |
| 14 |  | -6.8805 | -6.3953 |
| 15 |  | -9.6853 | -9.7483 |
| 16 |  | -7.9434 | -7.4818 |
| 17 |  | -5.9432 | -5.8437 |
| 18 |  | -6.2099 | -6.2001 |
| 19 |  | -6.535  | -6.4084 |
| 20 |  | -7.0898 | -6.9632 |
| 21 |  | -6.5435 | -6.2478 |
| 22 |  | -6.7111 | -6.651  |
| 23 |  | -6.8788 | -6.7246 |

|    |  |         |         |
|----|--|---------|---------|
| 24 |  | -7.4165 | -7.1454 |
| 25 |  | -6.323  | -6.5084 |
| 26 |  | -6.6846 | -6.6301 |
| 27 |  | -6.8104 | -7.1264 |
| 28 |  | -7.4474 | -7.4294 |
| 29 |  | -6.8822 | -7.1336 |
| 30 |  | -7.2345 | -7.1225 |
| 31 |  | -7.3763 | -7.1247 |
| 32 |  | -8.0286 | -7.8087 |
| 33 |  | -7.5658 | -7.2053 |
| 34 |  | -8.004  | -7.6662 |
| 35 |  | -8.7108 | -8.1956 |
| 36 |  | -8.2734 | -7.9633 |
| 37 |  | -8.4184 | -7.5127 |

|    |                                                                                     |         |         |
|----|-------------------------------------------------------------------------------------|---------|---------|
| 38 | 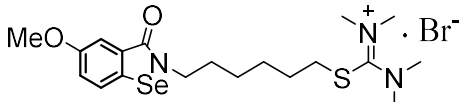   | -8.9525 | -8.9512 |
| 39 |    | -7.6058 | -7.3357 |
| 40 |    | -6.8161 | -6.5064 |
| 41 |    | -6.6782 | -6.2824 |
| 42 |    | -7.3962 | -7.5718 |
| 43 |    | -6.8814 | -6.5217 |
| 44 |   | -7.7893 | -7.7489 |
| 45 |  | -7.3814 | -7.2171 |
| 46 |  | -7.1584 | -6.7993 |
| 47 |  | -8.1724 | -7.5869 |
| 48 |  | -7.1726 | -7.1093 |
| 49 |  | -7.1708 | -7.0021 |
| 50 |  | -8.3649 | -7.8601 |
| 51 |  | -6.8303 | -6.6465 |

|    |                                                                                     |         |         |
|----|-------------------------------------------------------------------------------------|---------|---------|
| 52 | 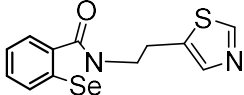   | -6.6914 | -6.3516 |
| 53 |    | -8.5664 | -7.8869 |
| 54 |    | -7.0927 | -6.9791 |
| 55 |    | -7.0586 | -6.844  |
| 56 |    | -8.5    | -8.1627 |
| 57 |    | -7.3793 | -7.0927 |
| 58 |   | -7.0809 | -7.0137 |
| 59 |  | -8.7852 | -8.1407 |
| 60 |  | -7.4031 | -7.6642 |
| 61 |  | -7.4504 | -7.2644 |
| 62 |  | -8.6114 | -8.0218 |
| 63 |  | -8.1202 | -7.5493 |
| 64 |  | -6.5436 | -6.3148 |
| 65 |  | -9.0012 | -7.6649 |

|    |  |         |         |
|----|--|---------|---------|
| 66 |  | -7.1641 | -6.7902 |
| 67 |  | -7.4368 | -6.9729 |
| 68 |  | -7.7293 | -7.4698 |
| 69 |  | -7.8597 | -7.893  |
| 70 |  | -8.4934 | -8.0367 |
| 71 |  | -7.7939 | -7.2604 |
| 72 |  | -8.1845 | -7.8381 |
| 73 |  | -8.6254 | -8.125  |
| 74 |  | -8.9799 | -8.3684 |
| 75 |  | -9.0213 | -8.626  |
| 76 |  | -9.6469 | -8.983  |
| 77 |  | -9.8018 | -9.002  |
| 78 |  | -9.9109 | -8.6073 |
| 79 |  | -7.8772 | -7.4761 |

|    |  |          |         |
|----|--|----------|---------|
| 80 |  | -8.3347  | -7.5228 |
| 81 |  | -8.4679  | -7.9495 |
| 82 |  | -8.9819  | -8.475  |
| 83 |  | -8.1215  | -7.9868 |
| 84 |  | -8.4919  | -8.141  |
| 85 |  | -9.1006  | -8.1858 |
| 86 |  | -9.1712  | -8.7091 |
| 87 |  | -9.6775  | -8.3543 |
| 88 |  | -9.9083  | -9.2171 |
| 89 |  | -10.069  | -9.2565 |
| 90 |  | -10.1153 | -9.7788 |
| 91 |  | -8.7214  | -8.6015 |
| 92 |  | -8.5688  | -9.5336 |
| 93 |  | -8.7446  | -9.3291 |

|     |  |         |          |
|-----|--|---------|----------|
| 94  |  | -11.111 | -10.7897 |
| 95  |  | -6.9715 | -7.3884  |
| 96  |  | -7.0311 | -6.8375  |
| 97  |  | -7.3336 | -7.2154  |
| 98  |  | -9.3951 | -9.2027  |
| 99  |  | -9.4042 | -10.2245 |
| 100 |  | -7.5503 | -7.0671  |
| 101 |  | -8.084  | -7.7107  |
| 102 |  | -6.6668 | -6.4157  |
| 103 |  | -9.8637 | -9.3388  |
| 104 |  | -9.3604 | -8.4963  |
| 105 |  | -8.6033 | -8.0493  |



|     |  |         |         |
|-----|--|---------|---------|
| 106 |  | -8.7528 | -8.3836 |
| 107 |  | -8.0861 | -7.5963 |
| 108 |  | -8.0884 | -8.0639 |
| 109 |  | -7.6045 | -7.5911 |
| 110 |  | -7.3662 | -8.4542 |
| 111 |  | -8.5206 | -8.4613 |
| 112 |  | -7.3483 | -7.7277 |
| 113 |  | -7.0681 | -6.583  |
| 114 |  | -7.6229 | -7.7006 |
| 115 |  | -9.8637 | -8.9304 |
| 116 |  | -9.1284 | -8.6102 |
| 117 |  | -8.2538 | -7.6573 |
| 118 |  | -7.8845 | -8.0896 |

|     |                                                                                     |         |         |
|-----|-------------------------------------------------------------------------------------|---------|---------|
| 119 | 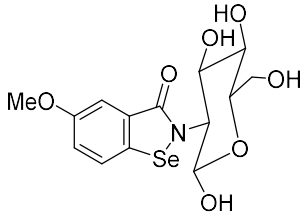   | -7.4118 | -6.6782 |
| 120 |    | -5.5328 | -5.3425 |
| 121 |    | -5.2838 | -5.4243 |
| 122 |    | -6.4263 | -6.1402 |
| 123 |    | -7.4037 | -6.5155 |
| 124 |   | -7.7802 | -6.9626 |
| 125 |  | -8.0855 | -7.1305 |
| 126 |  | -6.2801 | -6.1155 |
| 127 |  | -6.7913 | -6.2652 |
| 128 |  | -6.5296 | -6.4983 |
| 129 |  | -6.0265 | -5.7895 |
| 130 |  | -5.616  | -5.568  |
| 131 |  | -7.1448 | -7.05   |

|     |                                                                                     |         |         |
|-----|-------------------------------------------------------------------------------------|---------|---------|
| 132 | 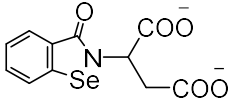   | -6.3471 | -6.629  |
| 133 |    | -6.9216 | -7.1127 |
| 134 |    | -7.2191 | -7.4741 |
| 135 |    | -7.3736 | -7.098  |
| 136 |    | -7.0311 | -7.1617 |
| 137 |   | -6.3359 | -6.1675 |
| 138 |  | -6.7441 | -7.0555 |
| 139 |  | -8.0953 | -7.1502 |
| 140 |  | -6.6781 | -6.5631 |
| 141 |  | -6.9174 | -7.0623 |
| 142 |  | -6.8709 | -6.7003 |
| 143 |  | -6.1289 | -6.0706 |
| 144 |  | -6.4107 | -6.4666 |

|     |                                                                                     |         |         |
|-----|-------------------------------------------------------------------------------------|---------|---------|
| 145 | 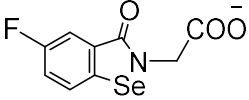   | -5.5059 | -5.6643 |
| 146 |    | -7.139  | -7.0798 |
| 147 |    | -6.7413 | -6.8907 |
| 148 |    | -7.3295 | -7.5631 |
| 149 |    | -7.3698 | -7.055  |
| 150 |   | -7.7695 | -7.411  |
| 151 |  | -9.0413 | -8.4507 |
| 152 |  | -7.168  | -6.9414 |
| 153 |  | -4.9319 | -4.8986 |
| 154 |  | -5.5144 | -5.3224 |
| 155 |  | -6.777  | -6.2242 |
| 156 |  | -7.4199 | -6.4958 |
| 157 |  | -6.3405 | -6.3301 |

|     |                                                                                     |         |         |
|-----|-------------------------------------------------------------------------------------|---------|---------|
| 158 | 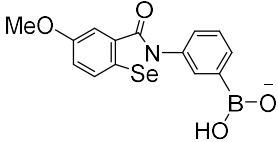   | -6.8079 | -6.9559 |
| 159 |    | -6.8608 | -6.7888 |
| 160 |    | -6.6295 | -7.062  |
| 161 |    | -6.6404 | -6.1936 |
| 162 |    | -6.924  | -6.5806 |
| 163 |   | -6.6242 | -6.3045 |
| 164 |  | -7.0357 | -6.6989 |
| 165 |  | -6.3027 | -6.6955 |
| 166 |  | -6.9527 | -6.7661 |
| 167 |  | -6.9286 | -6.8749 |
| 168 |  | -7.2135 | -7.1542 |
| 169 |  | -7.3677 | -6.9435 |

|     |                                                                                     |         |         |
|-----|-------------------------------------------------------------------------------------|---------|---------|
| 170 | 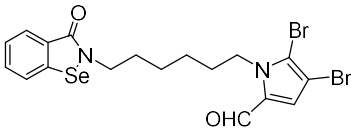   | -8.1971 | -7.3675 |
| 171 |    | -6.6653 | -7.0036 |
| 172 |    | -7.5664 | -7.2667 |
| 173 |    | -7.0522 | -6.8744 |
| 174 |    | -7.9797 | -7.2631 |
| 175 |   | -7.8671 | -7.5022 |
| 176 |  | -8.741  | -7.914  |
| 177 |  | -6.6833 | -6.1572 |
| 178 |  | -7.0338 | -6.6492 |
| 179 |  | -8.0127 | -7.265  |
| 180 |  | -7.0632 | -6.9653 |
| 181 |  | -7.5091 | -7.2987 |
| 182 |  | -7.5197 | -6.8419 |

|     |  |          |         |
|-----|--|----------|---------|
| 183 |  | -7.6871  | -7.1633 |
| 184 |  | -7.9542  | -7.4267 |
| 185 |  | -8.067   | -7.687  |
| 186 |  | -8.5261  | -7.5711 |
| 187 |  | -8.9852  | -8.0598 |
| 188 |  | -9.6471  | -7.6932 |
| 189 |  | -9.5735  | -7.4713 |
| 190 |  | -9.372   | -8.0108 |
| 191 |  | -10.5659 | -8.1266 |
| 192 |  | -9.925   | -7.9789 |
| 193 |  | -9.7914  | -8.2667 |
| 194 |  | -10.1509 | -7.9986 |

|     |                                                                                     |         |         |
|-----|-------------------------------------------------------------------------------------|---------|---------|
| 195 | 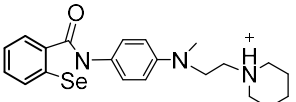   | -8.1882 | -7.124  |
| 196 |    | -8.4213 | -7.8641 |
| 197 |    | -8.2611 | -7.6875 |
| 198 |    | -9.1389 | -7.6478 |
| 199 |    | -9.4598 | -8.5863 |
| 200 |    | -6.3114 | -5.6773 |
| 201 |   | -7.0683 | -6.8548 |
| 202 |  | -6.8443 | -6.3774 |
| 203 |  | -7.1797 | -6.5268 |
| 204 |  | -7.4772 | -7.1854 |
| 205 |  | -7.1577 | -6.6484 |
| 206 |  | -6.4393 | -6.0724 |
| 207 |  | -7.0033 | -6.6051 |
| 208 |  | -7.0708 | -6.7748 |



|     |                                                                                     |         |         |
|-----|-------------------------------------------------------------------------------------|---------|---------|
| 209 | 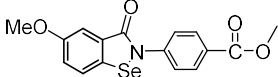   | -7.4997 | -7.1842 |
| 210 |    | -6.4072 | -6.4627 |
| 211 |    | -6.9585 | -6.5157 |
| 212 |    | -5.8128 | -5.8303 |
| 213 |    | -6.2407 | -6.1773 |
| 214 |    | -7.4347 | -6.6797 |
| 215 |  | -7.8229 | -7.0822 |
| 216 |  | -7.6025 | -6.9484 |
| 217 |  | -7.7925 | -7.3364 |
| 218 |  | -8.2174 | -7.8189 |
| 219 |  | -8.522  | -8.1796 |
| 220 |  | -6.1087 | -5.9913 |
| 221 |  | -6.5183 | -6.5147 |

|     |                                                                                     |         |         |
|-----|-------------------------------------------------------------------------------------|---------|---------|
| 222 | 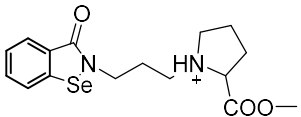   | -7.7573 | -7.3245 |
| 223 |    | -7.9226 | -8.168  |
| 224 |    | -8.3929 | -8.2151 |
| 225 |    | -9.1766 | -8.7376 |
| 226 |    | -6.688  | -6.5551 |
| 227 |    | -7.1773 | -6.9376 |
| 228 |   | -6.9872 | -6.9873 |
| 229 |  | -7.2931 | -7.3824 |
| 230 |  | -6.9297 | -6.6167 |
| 231 |  | -7.318  | -7.1968 |
| 232 |  | -7.0158 | -6.8988 |
| 233 |  | -7.557  | -7.4935 |

|     |                                                                                     |         |         |
|-----|-------------------------------------------------------------------------------------|---------|---------|
| 234 | 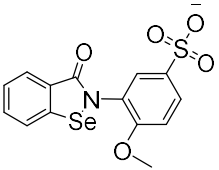   | -7.4289 | -6.6886 |
| 235 |    | -7.4949 | -7.0698 |
| 236 |    | -7.3507 | -7.1865 |
| 237 |    | -7.7838 | -7.3728 |
| 238 |   | -8.2507 | -7.8968 |
| 239 |  | -8.7255 | -8.2962 |
| 240 |  | -9.1166 | -8.4603 |
| 241 |  | -9.34   | -8.9282 |
| 242 |  | -6.1843 | -6.5962 |
| 243 |  | -7.3734 | -7.1148 |
| 244 |  | -7.0239 | -6.5305 |

|     |                                                                                     |         |         |
|-----|-------------------------------------------------------------------------------------|---------|---------|
| 245 | 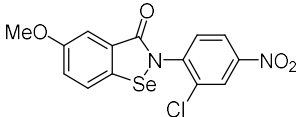   | -7.4627 | -7.3316 |
| 246 |    | -6.9705 | -6.7497 |
| 247 |    | -7.2242 | -7.1632 |
| 248 |    | -7.246  | -7.2319 |
| 249 |    | -7.8654 | -7.5675 |
| 250 |    | -7.9546 | -7.8829 |
| 251 |  | -8.4592 | -7.876  |
| 252 |  | -6.9306 | -6.3791 |
| 253 |  | -7.435  | -6.8736 |
| 254 |  | -6.1711 | -6.1025 |
| 255 |  | -6.6373 | -6.519  |
| 256 |  | -9.2311 | -8.145  |
| 257 |  | -9.4009 | -8.6129 |

|     |                                                                                     |          |         |
|-----|-------------------------------------------------------------------------------------|----------|---------|
| 258 | 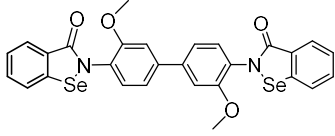   | -10.8445 | -8.8799 |
| 259 |    | -10.016  | -8.6649 |
| 260 |    | -6.4501  | -6.0574 |
| 261 |    | -6.8698  | -6.5246 |
| 262 |    | -6.519   | -6.3981 |
| 263 |   | -7.0612  | -6.8269 |
| 264 |  | -8.259   | -7.4505 |
| 265 |  | -8.9116  | -8.4717 |
| 266 |  | -7.2902  | -7.0157 |
| 267 |  | -7.8659  | -7.015  |
| 268 |  | -7.6664  | -7.5998 |
| 269 |  | -8.1916  | -8.0021 |
| 270 |  | -9.3989  | -8.324  |

|     |                                                                                     |         |         |
|-----|-------------------------------------------------------------------------------------|---------|---------|
| 271 | 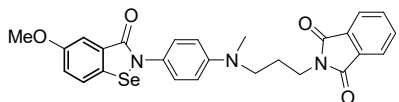   | -9.5092 | -8.5089 |
| 272 |    | -7.1373 | -6.787  |
| 273 |    | -7.7158 | -7.6279 |
| 274 |    | -7.7702 | -7.4154 |
| 275 |    | -8.2664 | -7.9518 |
| 276 |    | -8.0889 | -7.2676 |
| 277 |   | -8.5529 | -7.8619 |
| 278 |  | -9.2424 | -8.6616 |
| 279 |  | -9.5219 | -8.7917 |
| 280 |  | -7.7122 | -7.2398 |
| 281 |  | -7.8883 | -7.8752 |

|     |                                                                                     |         |         |
|-----|-------------------------------------------------------------------------------------|---------|---------|
| 282 | 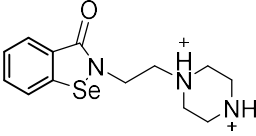   | -7.4479 | -6.6911 |
| 283 |    | -7.7148 | -7.2802 |
| 284 |    | -8.7275 | -8.3676 |
| 285 |    | -9.2994 | -7.9955 |
| 286 |    | -6.3974 | -6.2357 |
| 287 |   | -6.8216 | -6.3707 |
| 288 |  | -9.4211 | -8.6657 |
| 289 |  | -9.5847 | -9.4119 |
| 290 |  | -7.1504 | -6.8652 |
| 291 |  | -7.6384 | -6.9793 |

|     |                                                                                     |         |         |
|-----|-------------------------------------------------------------------------------------|---------|---------|
| 292 | 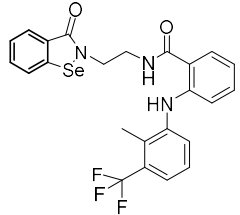   | -8.9057 | -8.4803 |
| 293 |    | -9.5418 | -9.167  |
| 294 |    | -7.2261 | -6.9761 |
| 295 |    | -7.7682 | -7.5343 |
| 296 |   | -7.7535 | -7.404  |
| 297 |  | -8.3883 | -7.9162 |
| 298 |  | -9.5272 | -8.7217 |
| 299 |  | -9.9381 | -9.3654 |
| 300 |  | -7.844  | -7.4391 |



**Table S2.** Binding free energy calculation and decomposition using the MMGBSA script in AMBER 16.

| <b>Compound Number</b> | <b>Binding free energy</b> | <b>Compound Number</b> | <b>Binding free energy</b> |
|------------------------|----------------------------|------------------------|----------------------------|
| 65                     | -50.1675±1.0149            | 75                     | -58.2660±0.8334            |
| 76                     | -41.1891±0.7926            | 77                     | -50.5297±0.8414            |
| 78                     | -44.1653±0.6886            | 85                     | -40.1798±1.0718            |
| 86                     | -59.1457±1.2310            | 87                     | -40.4153±1.0148            |
| 88                     | -50.9957±0.9054            | 89                     | -46.5625±1.6331            |
| 90                     | -47.8221±0.7948            | 94                     | -32.1107±0.9866            |
| 98                     | -28.3848±1.1840            | 99                     | -45.4442±1.0132            |
| 104                    | -46.5621±1.1826            | 116                    | -36.8738±0.7043            |
| 151                    | -42.5155±1.0010            | 188                    | -38.5763±0.8896            |
| 190                    | -39.2805±2.0498            | 191                    | -64.1102±1.1160            |
| 192                    | -61.4149±0.9947            | 193                    | -50.8160±1.2643            |
| 194                    | -60.2086±1.0741            | 198                    | -52.3320±0.7155            |
| 199                    | -59.8037±1.1250            | 225                    | -41.9554±0.7624            |
| 240                    | -44.8807±0.8251            | 241                    | -51.9235±0.9427            |
| 256                    | -55.3331±0.9213            | 257                    | -52.2890±0.8211            |
| 258                    | -60.3422±0.7868            | 259                    | -53.2528±0.8264            |
| 270                    | -52.8233±0.8234            | 271                    | -57.4254±0.9254            |
| 278                    | -44.0144±0.9275            | 279                    | -43.1069±0.6712            |
| 288                    | -46.7632±0.7423            | 289                    | -51.7130±0.6518            |
| 292                    | -44.9514±0.8639            | 293                    | -45.4408±0.8461            |

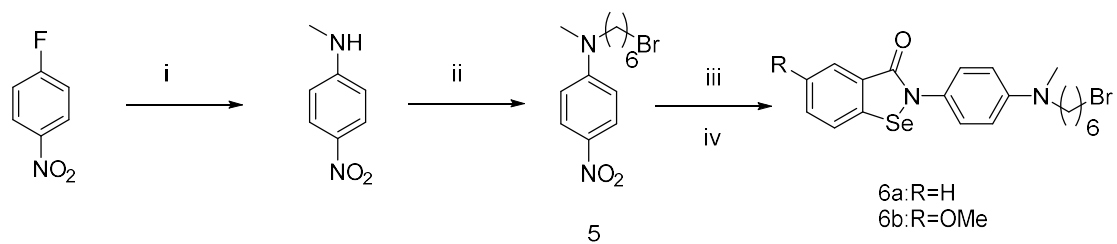

**Scheme S1. Synthesis of compounds 6a~6b.** Reagents and conditions: (i) Methylamine hydrochloride,  $K_2CO_3$ , DMSO,  $85^\circ C$ , overnight, 98%; (ii)  $Br(CH_2)_6Br$ , NaH, THF,  $0^\circ C \sim rt$ , 3h, 70%; (iii) Fe/HCl, Methanol,  $80^\circ C$ , 3h; (iv) **1a~b**,  $Et_3N$ , THF, rt, 5h, 35%-37% (2 steps)

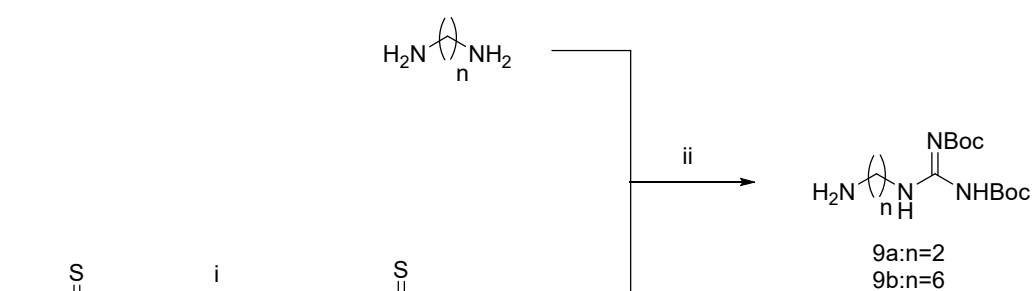

**Scheme S2. Synthesis of compounds 9a~9b.** Reagents and conditions: (i)  $(Boc)_2O$ , DCM, rt, 1h, 33%; (ii) DCM, rt, 30min, 60%-70%.

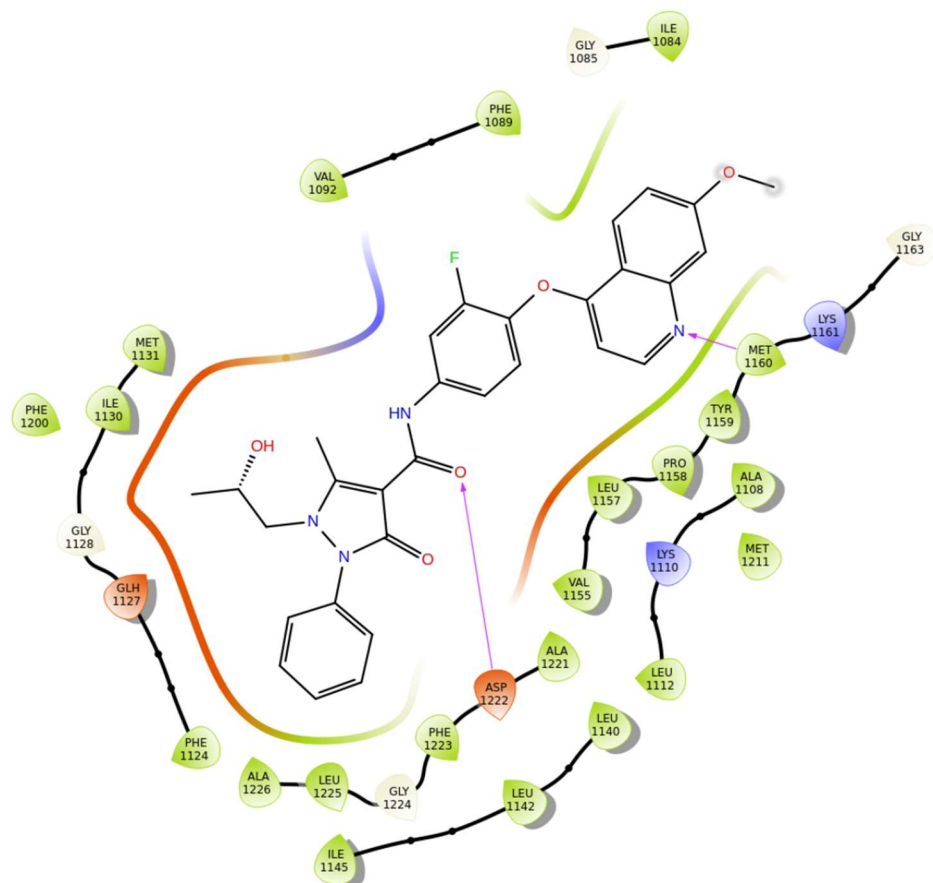

**Fig S1. The binding mode of known c-Met inhibitor co-crystallized with the c-Met structure (3U6I) in two-dimensional panel. The purple arrow indicates the hydrogen bond.**

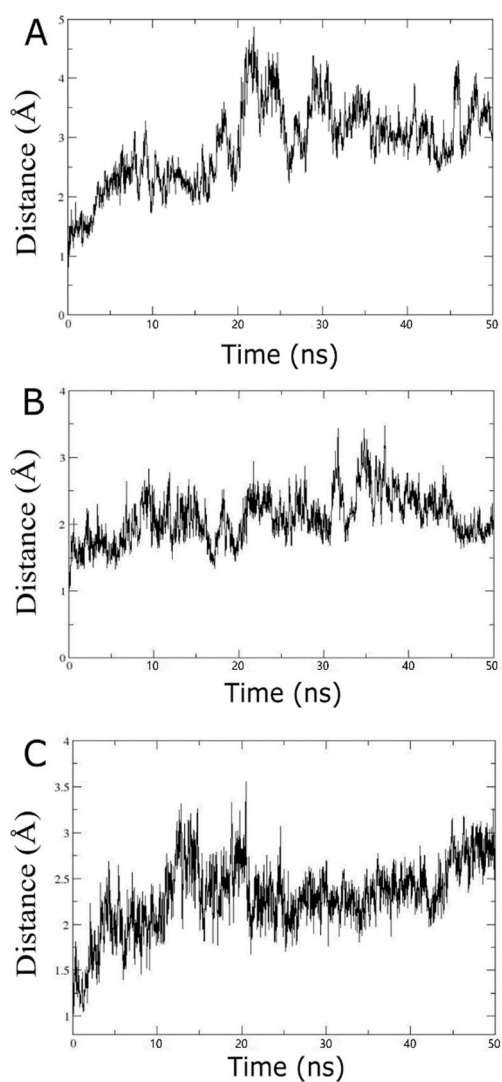

**Fig S2. Evolution of the root-mean-square deviations (RMSD) of the c-Met protein bound with 7a, 8a and 12c in 50 ns MD simulations. A) RMSD of the c-Met protein bound with 7a. B) RMSD of the c-Met protein bound with 8a. C) RMSD of the c-Met protein bound with 12c.**

#### **Analytical and spectral data for new compounds**

##### **2-(2-bromoethyl) benzo[d][1,2]selenazol-3(2H)-one (2a)**

Yellow solid (340mg, yield 56%), mp 195-197 °C;  $^1\text{H}$  NMR (500 MHz,  $\text{CDCl}_3$ )  $\delta$  8.07 (d,  $J$  = 7.8 Hz, 1H), 7.66 (d,  $J$  = 7.4 Hz, 1H), 7.64 – 7.60 (m, 1H), 7.47 – 7.42 (m, 1H), 4.24 (t,  $J$  = 6.3 Hz, 2H), 3.66 (t,  $J$  = 6.3 Hz, 2H);  $^{13}\text{C}$  NMR (126 MHz,  $\text{CDCl}_3$ )  $\delta$  167.43, 138.30, 132.36, 128.91, 126.41, 126.35, 123.96, 46.60, 30.45; MS (ESI)  $m/z$   $\text{ESI}^+$  305.03  $[\text{M}+\text{H}]^+$ .

2-(6-bromohexyl) benzo[d][1,2]selenazol-3(2H)-one (**2b**)

Yellow solid (360mg, yield 50%), mp 107-109 °C; <sup>1</sup>H NMR (500 MHz, CDCl<sub>3</sub>) δ 8.03 (d, *J* = 7.9 Hz, 1H), 7.64 (d, *J* = 7.9 Hz, 1H), 7.60 – 7.55 (m, 1H), 7.41 (t, *J* = 7.4 Hz, 1H), 3.85 (t, *J* = 7.1 Hz, 2H), 3.39 (t, *J* = 6.8 Hz, 2H), 1.88 – 1.81 (m, 2H), 1.77 – 1.69 (m, 2H), 1.49 (m, *J* = 14.3, 7.0 Hz, 2H), 1.45 – 1.38 (m, 2H); <sup>13</sup>C NMR (126 MHz, CDCl<sub>3</sub>) δ 167.17, 137.62, 131.90, 128.79, 127.50, 126.20, 123.99, 44.60, 33.75, 32.54, 30.32, 27.76, 25.72; MS (ESI) *m/z* ESI<sup>+</sup> 362.14 [M+H]<sup>+</sup>.

2-(2-bromoethyl)-5-methoxybenzo[d][1,2]selenazol-3(2H)-one (**2c**)

Yellow solid (422mg, yield 63%), mp 230-232 °C; <sup>1</sup>H NMR (500 MHz, CDCl<sub>3</sub>) δ 7.54 (d, *J* = 2.7 Hz, 1H), 7.50 (d, *J* = 8.7 Hz, 1H), 7.25 (dd, *J* = 8.7, 2.7 Hz, 1H), 4.22 (t, *J* = 6.4 Hz, 2H), 3.88 (s, 3H), 3.64 (t, *J* = 6.4 Hz, 2H); <sup>13</sup>C NMR (126 MHz, CDCl<sub>3</sub>) δ 167.30, 159.00, 129.11, 127.42, 124.67, 122.35, 110.64, 55.75, 46.76, 30.36; MS (ESI) *m/z* ESI<sup>+</sup> 336.06 [M+H]<sup>+</sup>.

2-(6-bromohexyl)-5-methoxybenzo[d][1,2]selenazol-3(2H)-one (**2d**)

Yellow solid (546mg, yield 70%), mp 110-112 °C; <sup>1</sup>H NMR (500 MHz, CDCl<sub>3</sub>) δ 7.52 (d, *J* = 2.6 Hz, 1H), 7.49 (d, *J* = 8.7 Hz, 1H), 7.21 (dd, *J* = 8.7, 2.7 Hz, 1H), 3.87 (s, 3H), 3.85 (t, *J* = 7.1 Hz, 2H), 3.39 (t, *J* = 6.8 Hz, 2H), 1.88 – 1.81 (m, 2H), 1.74 (dd, *J* = 13.9, 6.5 Hz, 2H), 1.52 – 1.46 (m, 2H), 1.44 – 1.38 (m, 2H); <sup>13</sup>C NMR (126 MHz, CDCl<sub>3</sub>) δ 167.04, 158.90, 128.51, 128.40, 124.67, 121.85, 110.60, 55.71, 44.79, 33.74, 32.55, 30.31, 27.76, 25.70; MS (ESI) *m/z* ESI<sup>+</sup> 392.17 [M+H]<sup>+</sup>.

2-(3-oxobenzo[d][1,2]selenazol-2(3H)-yl)ethyl carbamimidothioate hydrobromide (**3a**)

Yellow solid (179mg, yield 47%), mp 210-212 °C; <sup>1</sup>H NMR (500 MHz, DMSO-*d*<sub>6</sub>) δ 9.11 (s, 4H), 8.33 – 8.24 (m, 1H), 7.81 (d, *J* = 7.6 Hz, 1H), 7.60 (t, *J* = 7.4 Hz, 1H), 7.42 (t, *J* = 7.3 Hz, 1H), 3.99 (t, *J* = 6.4 Hz, 2H), 3.45 (t, *J* = 6.5 Hz, 2H); <sup>13</sup>C NMR (126 MHz, DMSO-*d*<sub>6</sub>) δ 169.94, 167.48, 140.59, 131.90, 128.18, 127.58, 127.05, 126.18, 42.27, 30.52; MS (ESI) *m/z* ESI<sup>+</sup> 302.25 [M+H]<sup>+</sup>.

6-(3-oxobenzo[d][1,2]selenazol-2(3H)-yl)hexyl carbamimidothioate hydrobromide (**3b**)

Yellow solid (227mg, yield 52%), mp 196-198 °C; <sup>1</sup>H NMR (500 MHz, DMSO-*d*<sub>6</sub>) δ 9.03 (d, *J* = 15.6 Hz, 4H), 8.16 (d, *J* = 8.0 Hz, 1H), 7.78 (dd, *J* = 7.8, 0.6 Hz, 1H), 7.60 – 7.55 (m, 1H), 7.42 – 7.37 (m, 1H), 3.70 (t, *J* = 7.0 Hz, 2H), 3.12 (t, *J* = 7.3 Hz, 2H), 1.60 (m, *J* = 15.2, 7.4 Hz, 4H), 1.43 – 1.39 (m, 2H), 1.38 – 1.31 (m, 2H); <sup>13</sup>C NMR (126 MHz, DMSO-*d*<sub>6</sub>) δ 170.38, 166.65, 139.69, 131.64, 128.73, 127.62, 126.62, 126.12, 43.42, 30.48, 30.22, 28.69, 27.88, 25.93; MS (ESI) *m/z* ESI<sup>+</sup> 358.35 [M+H]<sup>+</sup>.

2-(5-methoxy-3-oxobenzo[d][1,2]selenazol-2(3H)-yl)ethyl carbamimidothioate hydrobromide (**3c**)

Yellow solid (164mg, yield 40%), mp 175-177 °C; <sup>1</sup>H NMR (500 MHz, DMSO-d<sub>6</sub>) δ 9.14 (d, J = 98.1 Hz, 4H), 8.24 (d, J = 8.8 Hz, 1H), 7.28 (d, J = 2.7 Hz, 1H), 7.21 (dd, J = 8.8, 2.7 Hz, 1H), 3.95 (t, J = 6.7 Hz, 2H), 3.80 (s, 3H), 3.43 (t, J = 6.7 Hz, 2H). <sup>13</sup>C NMR (126 MHz, DMSO-d<sub>6</sub>) δ 170.12, 167.16, 158.59, 131.36, 129.21, 128.32, 120.70, 109.87, 55.89, 42.41, 30.52; MS (ESI) m/z ESI<sup>+</sup> 332.27 [M+H]<sup>+</sup>.

6-(5-methoxy-3-oxobenzo[d][1,2]selenazol-2(3H)-yl)hexyl carbamimidothioate hydrobromide (**3d**)

Yellow solid (280mg, yield 60%), mp 178-180 °C; <sup>1</sup>H NMR (500 MHz, DMSO-d<sub>6</sub>) δ 9.09 (s, 4H), 8.12 (d, J = 8.8 Hz, 1H), 7.27 (d, J = 2.7 Hz, 1H), 7.20 (dd, J = 8.8, 2.7 Hz, 1H), 3.81 (s, 3H), 3.67 (t, J = 7.0 Hz, 2H), 3.12 (t, J = 7.3 Hz, 2H), 1.64 – 1.55 (m, 4H), 1.42 – 1.36 (m, H), 1.35 – 1.27 (m, 2H). <sup>13</sup>C NMR (126 MHz, DMSO-d<sub>6</sub>) δ 170.17, 166.32, 158.56, 130.48, 129.81, 127.79, 120.44, 109.97, 55.86, 43.55, 30.46, 30.25, 28.71, 27.90, 25.93; MS (ESI) m/z ESI<sup>+</sup> 388.35 [M+H]<sup>+</sup>.

1,1,3,3-tetramethyl-2-(6-(3-oxobenzo[d][1,2]selenazol-2(3H)-yl)hexyl)isothiuronium hydrobromide (**4**)

Yellow solid (270mg, yield 55%), mp 171-173 °C; <sup>1</sup>H NMR (500 MHz, DMSO-d<sub>6</sub>) δ 8.47 (d, J = 8.0 Hz, 1H), 7.74 (d, J = 7.6 Hz, 1H), 7.52 (t, J = 7.6 Hz, 1H), 7.36 (t, J = 7.4 Hz, 1H), 3.67 (t, J = 6.9 Hz, 2H), 3.21 (s, 12H), 3.00 (t, J = 7.2 Hz, 2H), 1.64 – 1.53 (m, 4H), 1.41 – 1.28 (m, 4H); <sup>13</sup>C NMR (126 MHz, DMSO-d<sub>6</sub>) δ 174.49, 166.52, 140.21, 131.07, 129.33, 127.45, 127.27, 125.85, 43.92, 43.10, 34.20, 30.25, 29.57, 27.92, 25.96; MS (ESI) m/z ESI<sup>+</sup> 414.46 [M+H]<sup>+</sup>.

N-(6-bromohexyl)-N-methyl-4-nitroaniline (**5**)

Yellow solid (440mg, yield 70%), mp 56-58 °C; <sup>1</sup>H NMR (500 MHz, CDCl<sub>3</sub>) δ 8.11 (d, J = 8.9 Hz, 2H), 6.58 (d, J = 8.9 Hz, 2H), 3.45 – 3.39 (m, 4H), 3.07 (s, 3H), 1.91 – 1.84 (m, 2H), 1.68 – 1.61 (m, 2H), 1.54 – 1.47 (m, 2H), 1.38 (dd, J = 15.2, 7.9 Hz, 2H); <sup>13</sup>C NMR (126 MHz, CDCl<sub>3</sub>) δ 153.34, 136.74, 126.27, 110.07, 52.51, 38.77, 33.62, 32.56, 27.91, 26.76, 26.15; MS (ESI) m/z ESI<sup>+</sup> 316.21 [M+H]<sup>+</sup>.

2-(4-((6-bromohexyl) (methyl) amino) phenyl) benzo[d][1,2]selenazol-3(2H)-one (**6a**)

Yellow solid (163mg, yield 35%), mp 108-110 °C; <sup>1</sup>H NMR (500 MHz, CDCl<sub>3</sub>) δ 8.10 (d, J = 7.7 Hz, 1H), 7.62 (dt, J = 15.8, 7.8 Hz, 2H), 7.44 (t, J = 7.7 Hz, 1H), 7.38 (d, J = 8.9 Hz, 2H), 6.68 (d, J = 8.7 Hz, 2H), 3.41 (t, J = 6.7 Hz, 2H), 3.33 (t, J = 7.4 Hz, 2H), 2.95 (s, 3H), 1.91 – 1.76 (m, 2H), 1.60 (dt, J = 15.1, 7.6 Hz, 2H), 1.48 (dt, J = 15.1, 7.5 Hz, 2H), 1.35 (dt, J = 15.1, 7.5 Hz, 2H); <sup>13</sup>C NMR (126 MHz, CDCl<sub>3</sub>) δ 165.97, 148.31, 138.07, 133.74, 132.08, 130.57, 129.23, 127.38,

126.28, 123.76, 112.04, 52.64, 38.56, 33.84, 32.70, 28.03, 26.76, 26.29; MS (ESI) m/z ESI<sup>+</sup> 467.23 [M+H]<sup>+</sup>.

2-(4-((6-bromohexyl) (methyl) amino) phenyl)-5-methoxybenzo[d][1,2]selenazol-3(2H)-one (**6b**)

Yellow solid (184mg, yield 37%), mp 143-145 °C; <sup>1</sup>H NMR (500 MHz, CDCl<sub>3</sub>) δ 7.60 (s, 1H), 7.51 (d, *J* = 8.5 Hz, 1H), 7.39 (d, *J* = 7.9 Hz, 2H), 7.26 (s, 1H), 6.69 (d, *J* = 8.1 Hz, 2H), 3.91 (s, 3H), 3.43 (t, *J* = 6.6 Hz, 2H), 3.35 (t, *J* = 7.2 Hz, 2H), 2.97 (s, 3H), 1.92 – 1.85 (m, 2H), 1.65 – 1.60 (m, 2H), 1.53 – 1.47 (m, 2H), 1.40 – 1.35 (m, 2H); <sup>13</sup>C NMR (126 MHz, CDCl<sub>3</sub>) δ 165.85, 159.01, 148.35, 145.67, 128.88, 128.48, 127.31, 124.42, 122.08, 112.02, 111.02, 55.77, 52.64, 38.54, 33.79, 32.71, 28.04, 26.59, 26.31; MS (ESI) m/z ESI<sup>+</sup> 497.31 [M+H]<sup>+</sup>.

6-(methyl(4-(3-oxobenzo[d][1,2]selenazol-2(3H)-yl)phenyl)amino)hexyl carbamimidothioate hydrobromide (**7a**)

Yellow solid (143mg, yield 53%), mp 138-140 °C; <sup>1</sup>H NMR (500 MHz, DMSO-d<sub>6</sub>) δ 9.08 (s, 4H), 8.24 (d, *J* = 8.0 Hz, 1H), 7.83 (d, *J* = 7.7 Hz, 1H), 7.62 (t, *J* = 7.6 Hz, 1H), 7.44 (t, *J* = 7.4 Hz, 1H), 7.32 (d, *J* = 7.9 Hz, 2H), 6.71 (d, *J* = 8.1 Hz, 2H), 3.34 (t, *J* = 6.6 Hz, 2H), 3.14 (t, *J* = 7.1 Hz, 2H), 2.90 (s, 3H), 1.64 – 1.58 (m, 2H), 1.54 – 1.48 (m, 2H), 1.40 (m, 2H), 1.34 – 1.30 (m, 2H); <sup>13</sup>C NMR (126 MHz, DMSO-d<sub>6</sub>) δ 170.40, 165.20, 147.71, 139.88, 131.87, 130.10, 129.35, 128.37, 127.96, 126.76, 126.32, 112.34, 52.16, 38.59, 30.47, 28.83, 28.14, 26.29, 26.18; MS (ESI) m/z ESI<sup>+</sup> 451.48 [M+H]<sup>+</sup>.

6-((4-(5-methoxy-3-oxobenzo[d][1,2]selenazol-2(3H)-yl)phenyl)(methyl)amino)hexyl carbamimidothioate hydrobromide (**7b**)

Yellow solid (128mg, yield 45%), mp 145-147 °C; <sup>1</sup>H NMR (500 MHz, CD<sub>3</sub>OD) δ 7.80 (d, *J* = 8.8 Hz, 1H), 7.45 (d, *J* = 8.9 Hz, 2H), 7.30 (d, *J* = 2.5 Hz, 1H), 6.93 (dd, *J* = 8.9, 2.6 Hz, 1H), 6.76 (d, *J* = 8.9 Hz, 2H), 3.83 (s, 3H), 3.37 (t, 2H), 3.15 (t, *J* = 7.2 Hz, 2H), 2.94 (s, 3H), 1.75 – 1.70 (m, 2H), 1.65-1.59 (m, *J* = 7.0 Hz, 2H), 1.54 – 1.47 (m, 2H), 1.44 – 1.39 (m, 2H); <sup>13</sup>C NMR (126 MHz, CD<sub>3</sub>OD) δ 171.64, 167.37, 159.00, 147.19, 136.44, 133.31, 130.98, 128.44, 122.75, 117.10, 112.91, 112.27, 54.73, 52.32, 37.47, 30.40, 29.33, 28.24, 26.10, 26.00; MS (ESI) m/z ESI<sup>+</sup> 481.52 [M+H]<sup>+</sup>.

1,1,3,3-tetramethyl-2-(6-(methyl(4-(3-oxobenzo[d][1,2]selenazol-2(3H)-yl)phenyl)amino)hexyl)isothiuronium hydrobromide (**8a**)

Yellow solid (134mg, yield 45%), mp 125-127 °C; <sup>1</sup>H NMR (500 MHz, DMSO-d<sub>6</sub>) δ 8.34 (d, *J* = 7.7 Hz, 1H), 7.82 (d, *J* = 7.7 Hz, 1H), 7.60 (t, *J* = 7.6 Hz, 1H), 7.43 (t, *J* = 7.4 Hz, 1H), 7.33 (d,

$J = 8.4$  Hz, 2H), 6.72 (d,  $J = 8.3$  Hz, 2H), 3.33 (t,  $J = 7.2$  Hz, 2H), 3.22 (s, 12H), 3.02 (t,  $J = 7.2$  Hz, 2H), 2.90 (s, 3H), 1.62 – 1.56 (m, 2H), 1.55 – 1.49 (m, 2H), 1.43 – 1.37 (m, 2H), 1.34 – 1.30 (m, 2H);  $^{13}\text{C}$  NMR (126 MHz, DMSO- $d_6$ )  $\delta$  174.62, 165.10, 147.62, 139.92, 131.69, 129.62, 128.61, 127.85, 127.02, 126.65, 126.24, 112.36, 52.11, 43.90, 38.59, 34.21, 29.67, 28.29, 26.35, 26.26; MS (ESI)  $m/z$  ESI $^+$  519.60 [M+H] $^+$ .

2-(6-((4-(5-methoxy-3-oxobenzo[d][1,2]selenazol-2(3H)-yl)phenyl)(methyl)amino)hexyl)-1,1,3,3-tetramethylisothiuronium hydrobromide (**8b**)

Yellow solid (173mg, yield 55%), mp 130-132 °C;  $^1\text{H}$  NMR (500 MHz,  $\text{CD}_3\text{OD}$ )  $\delta$  7.84 (d,  $J = 8.8$  Hz, 1H), 7.51 (d,  $J = 2.6$  Hz, 1H), 7.34 – 7.29 (m, 3H), 6.79 (d,  $J = 8.9$  Hz, 2H), 3.90 (s, 3H), 3.42 (t,  $J = 7.2$  Hz, 2H), 3.30 (s, 12H), 3.06 (t,  $J = 7.3$  Hz, 2H), 2.98 (s, 3H), 1.74 – 1.68 (m, 2H), 1.66 – 1.61 (m, 2H), 1.55 – 1.47 (m, 2H), 1.44 – 1.39 (m, 2H);  $^{13}\text{C}$  NMR (126 MHz,  $\text{CD}_3\text{OD}$ )  $\delta$  176.00, 166.53, 159.18, 148.64, 130.71, 129.43, 128.63, 126.80, 125.65, 121.09, 111.93, 109.96, 54.71, 51.86, 42.81, 37.38, 34.04, 29.30, 28.10, 26.17, 26.07; MS (ESI)  $m/z$  ESI $^+$  549.63 [M+H] $^+$ .

(E)-1,2-diBoc-3-(2-(3-oxobenzo[d][1,2]selenazol-2(3H)-yl)ethyl)guanidine (**10a**)

Yellow solid (325mg, yield 67%), mp 157-159 °C;  $^1\text{H}$  NMR (500 MHz,  $\text{CDCl}_3$ )  $\delta$  11.45 (s, 1H), 8.55 (t,  $J = 4.7$  Hz, 1H), 8.04 (d,  $J = 7.7$  Hz, 1H), 7.62 (d,  $J = 7.9$  Hz, 1H), 7.60 – 7.56 (m, 1H), 7.44 – 7.39 (m, 1H), 4.05 (t,  $J = 6.0$  Hz, 2H), 3.74 (q,  $J = 5.9$  Hz, 2H), 1.49 (s, 9H), 1.45 (s, 9H);  $^{13}\text{C}$  NMR (126 MHz,  $\text{CDCl}_3$ )  $\delta$  167.49, 163.37, 156.43, 152.97, 138.18, 132.04, 128.83, 126.82, 126.18, 123.97, 83.24, 79.38, 43.81, 40.71, 28.27, 28.00; MS (ESI)  $m/z$  ESI $^+$  486.44 [M+H] $^+$ .

(E)-1,2-diBoc-3-(6-(3-oxobenzo[d][1,2]selenazol-2(3H)-yl)hexyl)guanidine (**10b**)

Yellow solid (379mg, yield 70%), mp 152-154 °C;  $^1\text{H}$  NMR (500 MHz,  $\text{CDCl}_3$ )  $\delta$  11.47 (s, 1H), 8.27 (s, 1H), 8.00 (d,  $J = 7.8$  Hz, 1H), 7.63 (d,  $J = 8.0$  Hz, 1H), 7.56 – 7.51 (m, 1H), 7.37 (t,  $J = 7.5$  Hz, 1H), 3.81 (t,  $J = 7.2$  Hz, 2H), 3.36 (dd,  $J = 12.6, 7.0$  Hz, 2H), 1.73 – 1.66 (m, 2H), 1.56 – 1.50 (m, 2H), 1.45 (d,  $J = 6.3$  Hz, 18H), 1.39 – 1.34 (m, 4H);  $^{13}\text{C}$  NMR (126 MHz,  $\text{CDCl}_3$ )  $\delta$  167.11, 163.57, 156.07, 153.25, 137.72, 131.80, 128.71, 127.54, 126.11, 124.04, 82.98, 79.15, 44.65, 40.74, 30.31, 28.83, 28.28, 28.04, 26.46, 26.23; MS (ESI)  $m/z$  ESI $^+$  542.55 [M+H] $^+$ .

(E)-1-(2-(5-methoxy-3-oxobenzo[d][1,2]selenazol-2(3H)-yl)ethyl)-2,3-diBocguanidine (**10c**)

Yellow solid (310mg, yield 60%), mp 153-155 °C;  $^1\text{H}$  NMR (500 MHz,  $\text{CDCl}_3$ )  $\delta$  11.44 (s, 1H), 8.53 (t,  $J = 5.3$  Hz, 1H), 7.50 (d,  $J = 2.6$  Hz, 1H), 7.48 (d,  $J = 8.7$  Hz, 1H), 7.19 (dd,  $J = 8.7, 2.6$  Hz, 1H), 4.01 (t,  $J = 6.0$  Hz, 2H), 3.84 (s, 3H), 3.72 (q,  $J = 5.9$  Hz, 2H), 1.47 (s, 9H), 1.43 (s,



9H);  $^{13}\text{C}$  NMR (126 MHz,  $\text{CDCl}_3$ )  $\delta$  167.37, 163.35, 158.85, 156.40, 152.94, 129.03, 127.82, 124.72, 121.98, 110.52, 83.18, 79.34, 55.67, 43.98, 40.69, 28.25, 27.98; MS (ESI)  $m/z$   $\text{ESI}^+$  516.47  $[\text{M}+\text{H}]^+$ .

1-(2-(3-oxobenzo[d][1,2]selenazol-2(3H)-yl)ethyl)guanidine hydrochloride (**11a**)

Yellow viscous liquid (148mg, yield 93%), mp 153-155 °C;  $^1\text{H}$  NMR (500 MHz,  $\text{DMSO-d}_6$ )  $\delta$  8.15 (d,  $J = 8.1$  Hz, 1H), 7.87 (t,  $J = 5.6$  Hz, 1H), 7.82 (d,  $J = 7.1$  Hz, 1H), 7.63 – 7.58 (m, 1H), 7.44 – 7.39 (m, 1H), 3.85 (t,  $J = 6.0$  Hz, 2H), 3.41 (q,  $J = 5.9$  Hz, 2H);  $^{13}\text{C}$  NMR (126 MHz,  $\text{DMSO-d}_6$ )  $\delta$  167.37, 157.58, 140.46, 131.88, 128.18, 127.65, 126.60, 126.11, 42.65, 41.25; MS (ESI)  $m/z$   $\text{ESI}^+$  285.20  $[\text{M}+\text{H}]^+$ .

1-(6-(3-oxobenzo[d][1,2]selenazol-2(3H)-yl)hexyl)guanidine hydrochloride (**11b**)

Yellow viscous liquid (169mg, yield 90%), mp 160-162 °C;  $^1\text{H}$  NMR (500 MHz,  $\text{DMSO-d}_6$ )  $\delta$  8.20 (d,  $J = 8.0$  Hz, 1H), 7.76 (d,  $J = 7.6$  Hz, 1H), 7.68 (t,  $J = 5.3$  Hz, 1H), 7.58 – 7.52 (m, 1H), 7.38 (t,  $J = 7.4$  Hz, 1H), 3.67 (d,  $J = 7.1$  Hz, 2H), 3.06 (dd,  $J = 12.8, 6.7$  Hz, 2H), 1.63 – 1.59 (m, 2H), 1.45 – 1.41 (m, 2H), 1.34 – 1.28 (m, 4H);  $^{13}\text{C}$  NMR (126 MHz,  $\text{DMSO-d}_6$ )  $\delta$  166.61, 157.36, 139.89, 131.47, 128.88, 127.52, 126.76, 126.02, 43.39, 41.04, 30.33, 28.79, 26.15, 26.13; MS (ESI)  $m/z$   $\text{ESI}^+$  341.31  $[\text{M}+\text{H}]^+$ .

1-(2-(5-methoxy-3-oxobenzo[d][1,2]selenazol-2(3H)-yl)ethyl)guanidine hydrochloride (**11c**)

Yellow viscous liquid (166mg, yield 95%), mp 165-167 °C;  $^1\text{H}$  NMR (500 MHz,  $\text{DMSO-d}_6$ )  $\delta$  8.15 (d,  $J = 8.1$  Hz, 1H), 7.87 (t,  $J = 5.6$  Hz, 1H), 7.82 (d,  $J = 7.1$  Hz, 1H), 7.63 – 7.58 (m, 1H), 7.44 – 7.39 (m, 1H), 3.85 (t,  $J = 6.0$  Hz, 2H), 3.41 (q,  $J = 5.9$  Hz, 2H);  $^{13}\text{C}$  NMR (126 MHz,  $\text{DMSO-d}_6$ )  $\delta$  167.37, 157.58, 140.46, 131.88, 128.18, 127.65, 126.60, 126.11, 42.65, 41.25; MS (ESI)  $m/z$   $\text{ESI}^+$  315.23  $[\text{M}+\text{H}]^+$ .

2-(4-(methylamino) phenyl) benzo[d][1,2]selenazol-3(2H)-one (**12a**)

Yellow solid (151mg, yield 50%);  $^1\text{H}$  NMR (500 MHz,  $\text{CDCl}_3$ )  $\delta$  8.10 (d,  $J = 7.8$  Hz, 1H), 7.66 – 7.59 (m, 2H), 7.45 (t,  $J = 7.0$  Hz, 1H), 7.36 (d,  $J = 7.8$  Hz, 2H), 6.63 (d,  $J = 7.7$  Hz, 2H), 2.86 (s, 3H);  $^{13}\text{C}$  NMR (126 MHz,  $\text{CDCl}_3$ )  $\delta$  165.96, 148.54, 138.00, 132.12, 129.28, 128.17, 127.54, 126.31, 123.70, 112.45, 30.73; MS (ESI)  $m/z$   $\text{ESI}^+$  304.22  $[\text{M}+\text{H}]^+$ .

benzyl methyl (4-(3-oxobenzo[d][1,2]selenazol-2(3H)-yl) phenyl) carbamate (**12b**)

Yellow solid (284mg, yield 65%), mp 147-149 °C;  $^1\text{H}$  NMR (500 MHz,  $\text{CDCl}_3$ )  $\delta$  8.13 (d,  $J = 7.8$  Hz, 1H), 7.67 (s, 2H), 7.62 (d,  $J = 7.2$  Hz, 2H), 7.51 – 7.47 (m, 1H), 7.39 – 7.28 (m, 7H), 5.20 (s, 2H), 3.35 (s, 3H);  $^{13}\text{C}$  NMR (126 MHz,  $\text{CDCl}_3$ )  $\delta$  165.74, 155.35, 137.53, 136.46, 132.62, 129.42,

128.49, 128.04, 127.90, 127.37, 126.61, 126.38, 125.78, 123.73, 67.50, 31.44; MS (ESI)  $m/z$  ESI<sup>+</sup> 438.36 [M+H]<sup>+</sup>.

2-(4-(methyl(3-(piperidin-1-yl) propyl) amino) phenyl) benzo[d][1,2]selenazol-3(2H)-one (**12c**)

Yellow solid (85mg, yield 40%), mp 200-202 °C; <sup>1</sup>H NMR (500 MHz, DMSO-*d*<sub>6</sub>) δ 8.30 (d, *J* = 8.0 Hz, 1H), 7.84 (d, *J* = 7.6 Hz, 1H), 7.61 (t, *J* = 7.4 Hz, 1H), 7.43 (t, *J* = 7.4 Hz, 1H), 7.35 (d, *J* = 8.8 Hz, 2H), 6.78 (d, *J* = 8.9 Hz, 2H), 3.40 (t, *J* = 7.0 Hz, 4H), 3.06 – 3.00 (m, 2H), 2.91 (s, 3H), 2.88 – 2.76 (m, 2H), 1.94 (m, 2H), 1.74 (s, 6H); <sup>13</sup>C NMR (126 MHz, DMSO-*d*<sub>6</sub>) δ 165.17, 147.42, 139.96, 131.78, 129.51, 129.09, 127.90, 126.84, 126.65, 126.27, 112.76, 54.15, 52.51, 49.60, 38.49, 22.93, 21.81, 21.20; MS (ESI)  $m/z$  ESI<sup>+</sup> 429.44 [M+H]<sup>+</sup>.

2-(2-(1H-imidazol-4-yl) ethyl) benzo[d][1,2]selenazol-3(2H)-one (**12d**)

White solid (184mg, yield 63%), mp 250-252 °C; <sup>1</sup>H NMR (500 MHz, DMSO-*d*<sub>6</sub>) δ 11.86 (s, 1H), 8.00 (d, *J* = 8.0 Hz, 1H), 7.80 (d, *J* = 7.7 Hz, 1H), 7.60 – 7.55 (m, 2H), 7.40 (t, *J* = 7.4 Hz, 1H), 6.84 (s, 1H), 3.97 (t, *J* = 7.0 Hz, 2H), 2.84 (t, *J* = 6.9 Hz, 2H); <sup>13</sup>C NMR (126 MHz, DMSO-*d*<sub>6</sub>) δ 166.68, 139.87, 135.27, 132.83, 131.80, 130.10, 128.31, 127.69, 126.21, 126.09, 43.73, 28.33; MS (ESI)  $m/z$  ESI<sup>+</sup> 293.20 [M+H]<sup>+</sup>.

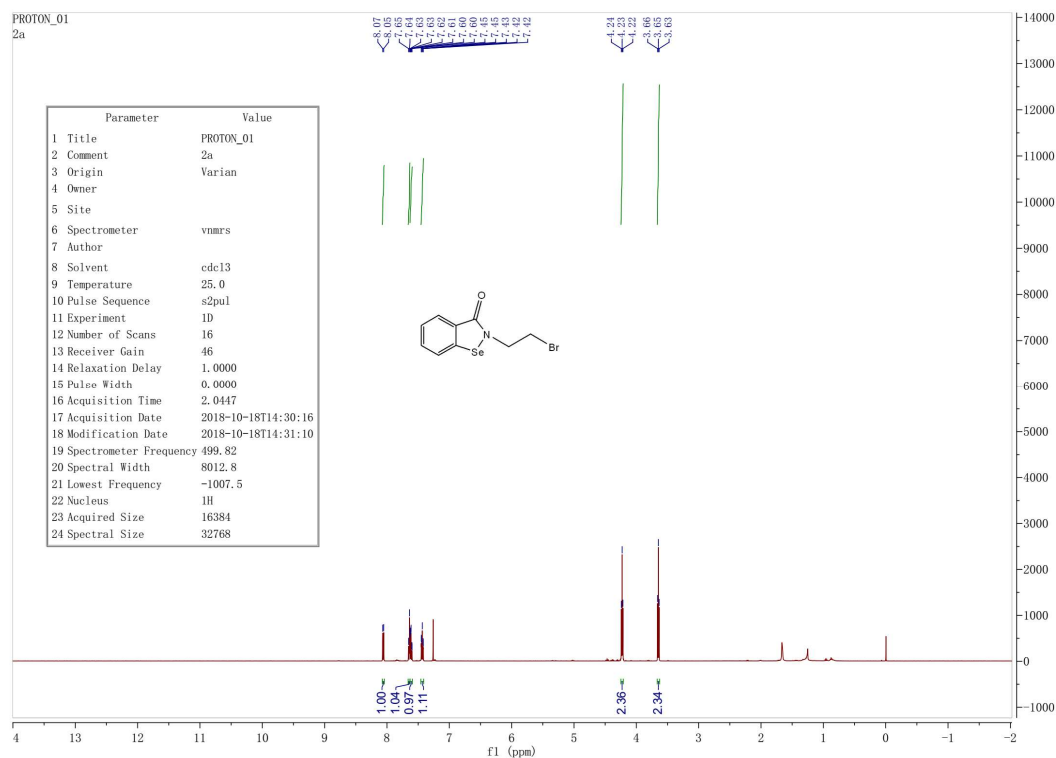

**Fig. S3.**  $^1\text{H}$  NMR Spectrum of **2a** in  $\text{CDCl}_3$  (500 MHz)

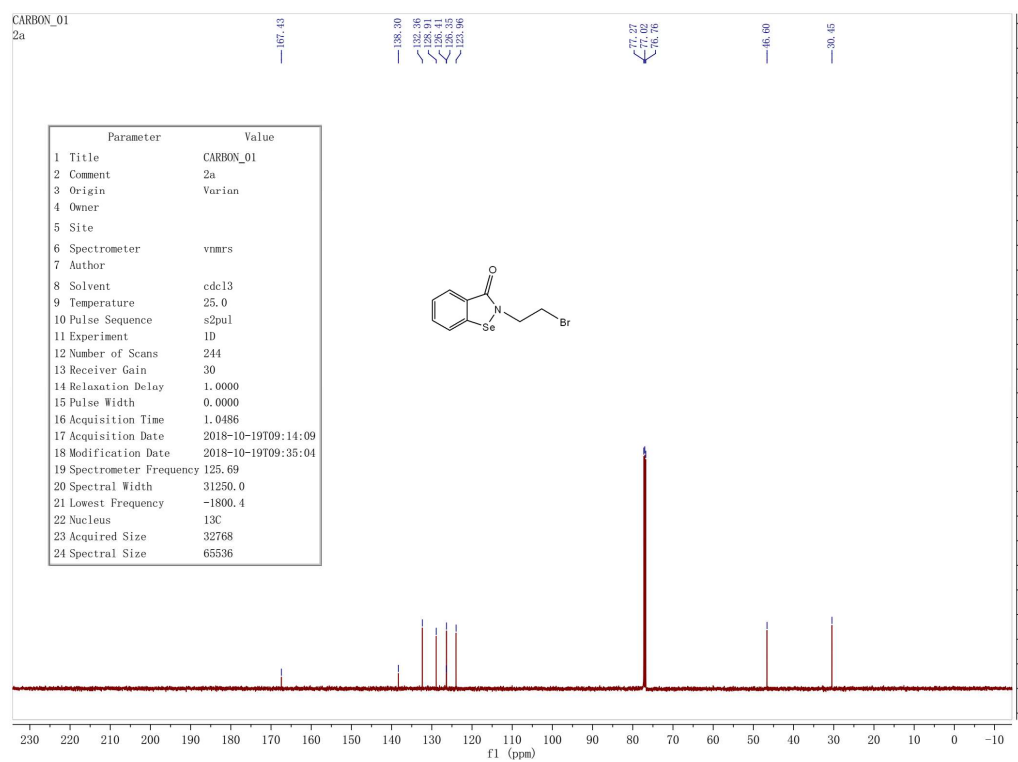

**Fig. S4.**  $^{13}\text{C}$  NMR Spectrum of **2a** in  $\text{CDCl}_3$  (126 MHz)

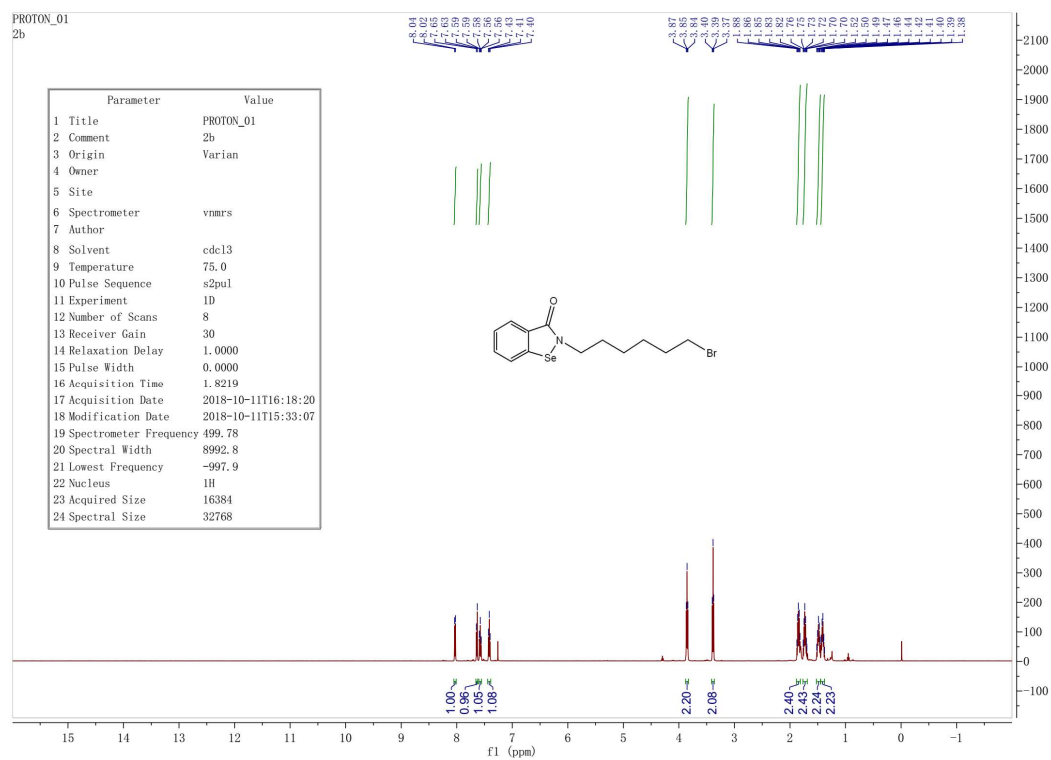

**Fig. S5.**  $^1\text{H}$  NMR Spectrum of **2b** in  $\text{CDCl}_3$  (500 MHz)

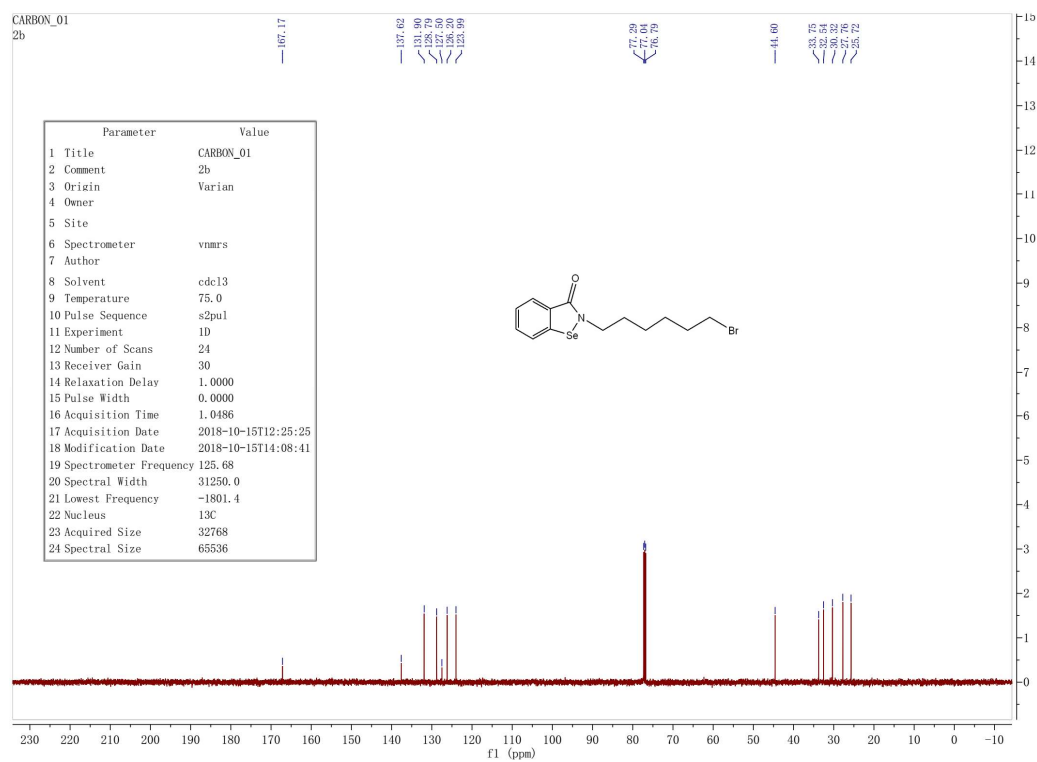

**Fig. S6.**  $^{13}\text{C}$  NMR Spectrum of **2b** in  $\text{CDCl}_3$  (126 MHz)

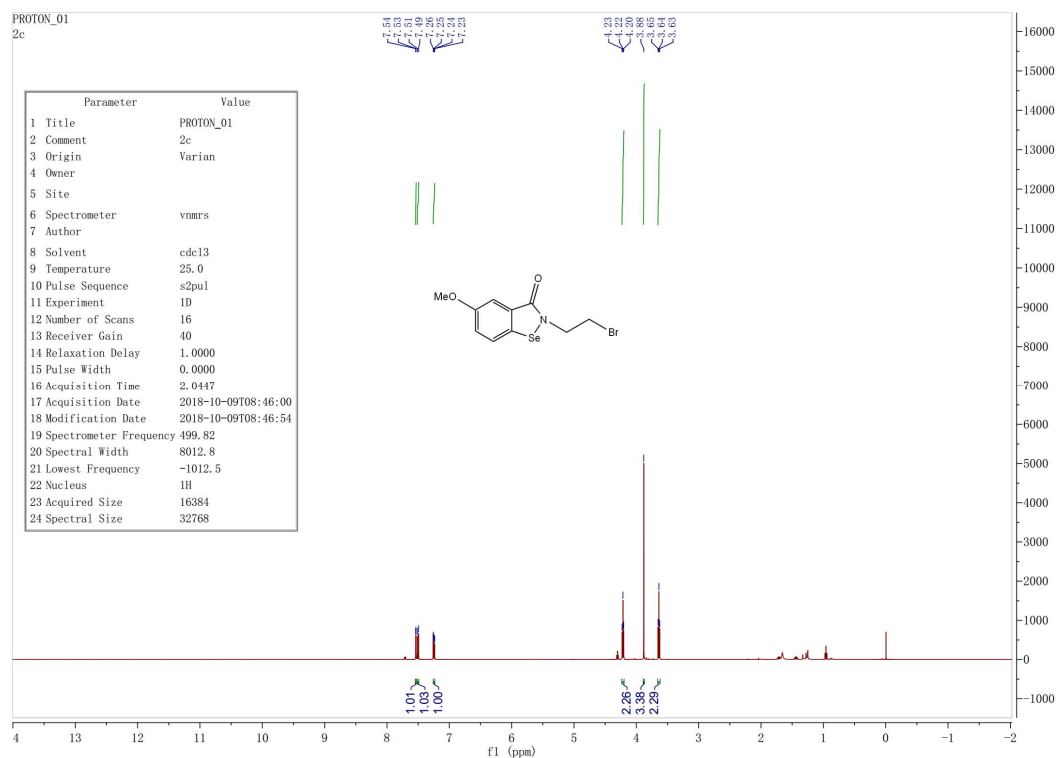

**Fig. S7.**  $^1\text{H}$  NMR Spectrum of **2c** in  $\text{CDCl}_3$  (500 MHz)

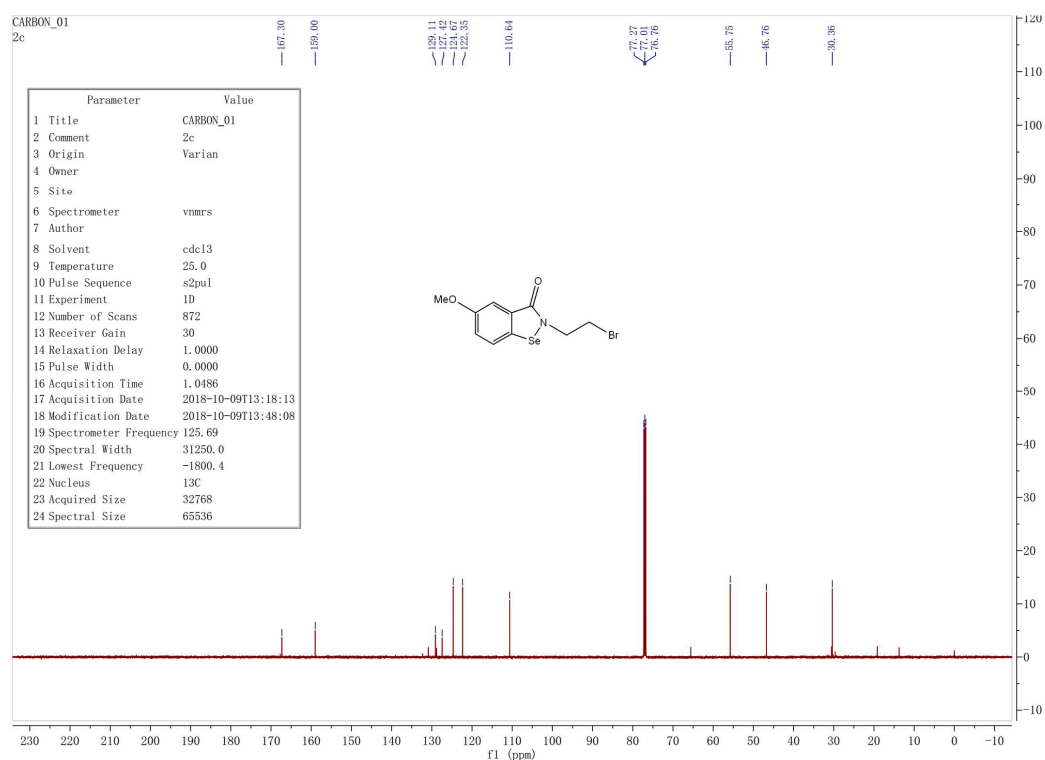

**Fig. S8.**  $^{13}\text{C}$  NMR Spectrum of **2c** in  $\text{CDCl}_3$  (126 MHz)

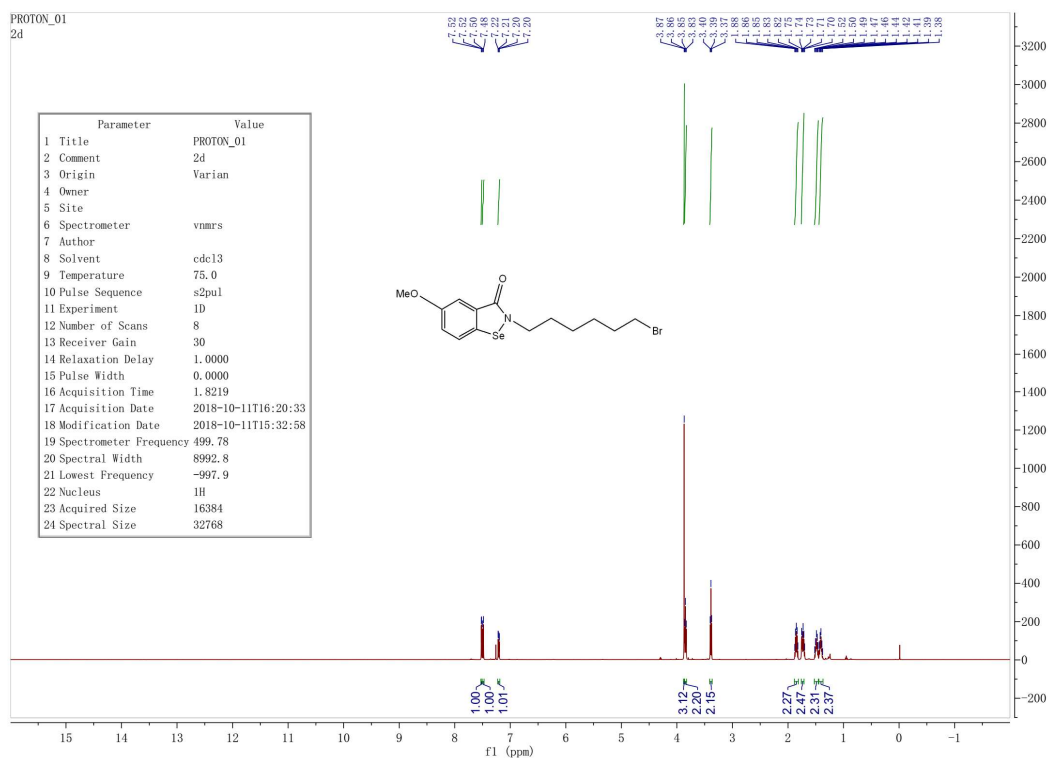

**Fig. S9.**  $^1\text{H}$  NMR Spectrum of **2d** in  $\text{CDCl}_3$  (500 MHz)

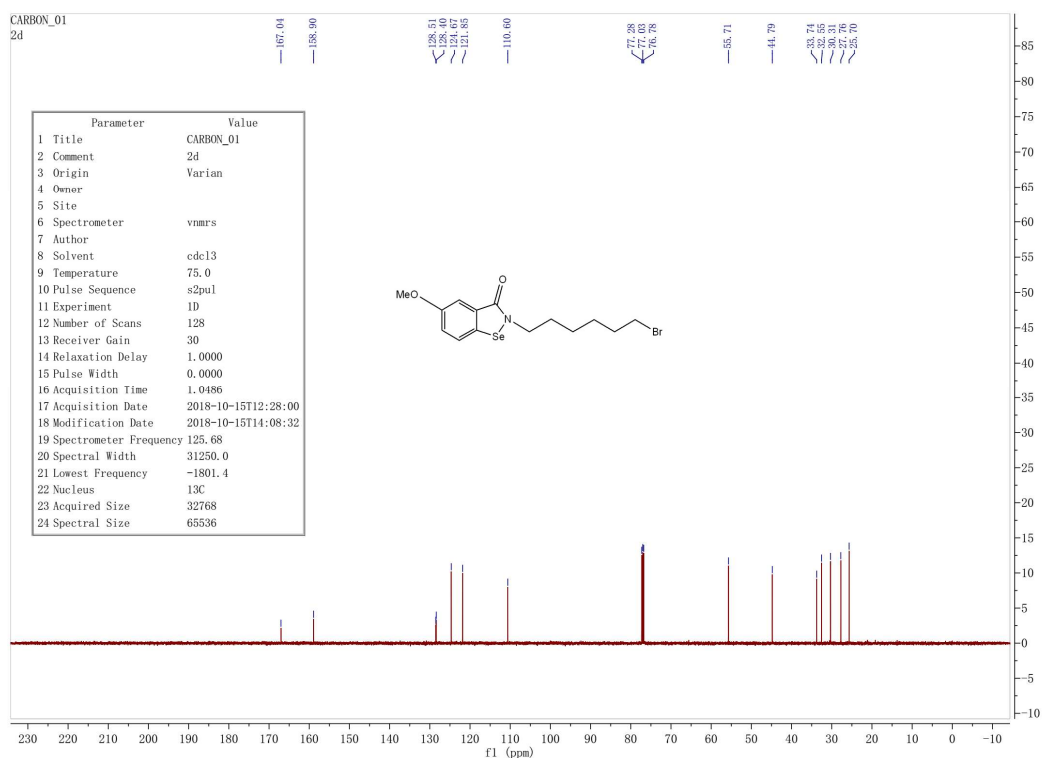

**Fig. S10.**  $^{13}\text{C}$  NMR Spectrum of **2d** in  $\text{CDCl}_3$  (126 MHz)

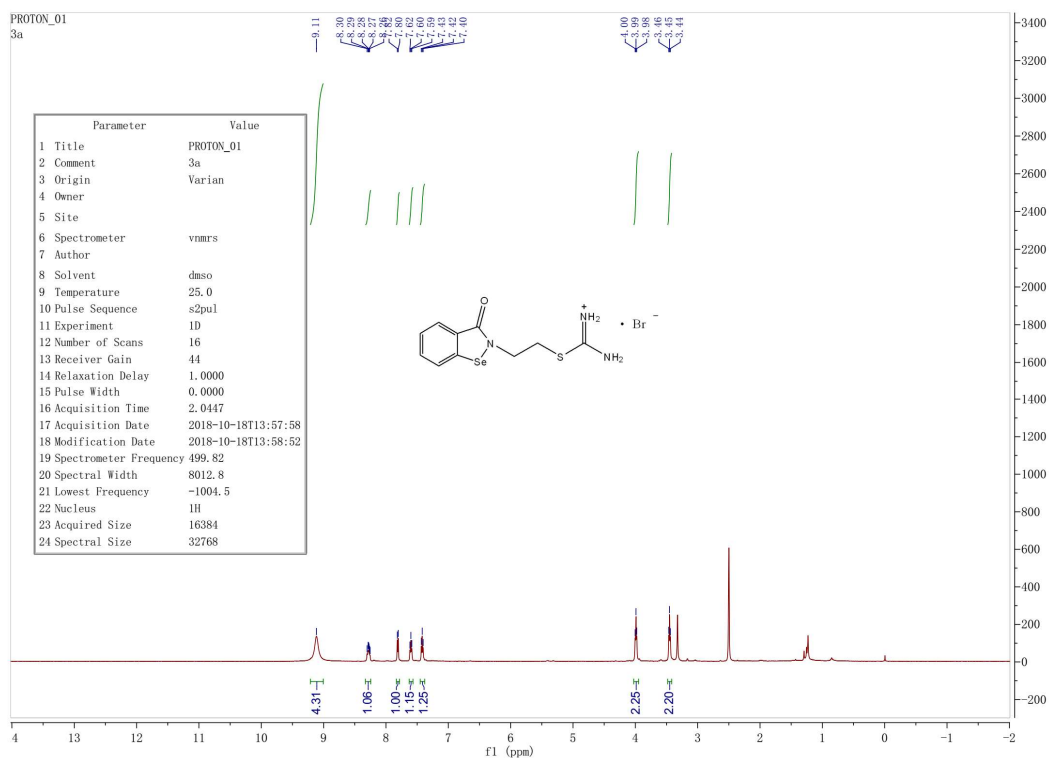

Fig. S11.  $^1\text{H}$  NMR Spectrum of **3a** in  $\text{DMSO-}d_6$  (500 MHz)

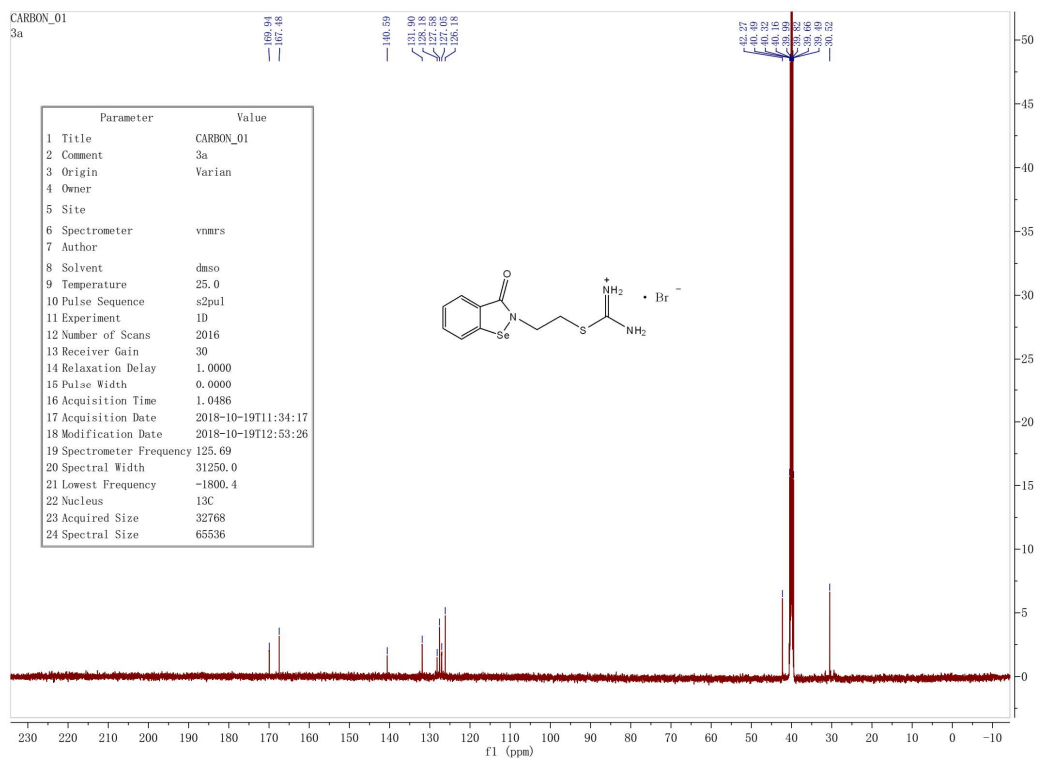

Fig. S12.  $^{13}\text{C}$  NMR Spectrum of **3a** in  $\text{DMSO-}d_6$  (126 MHz)

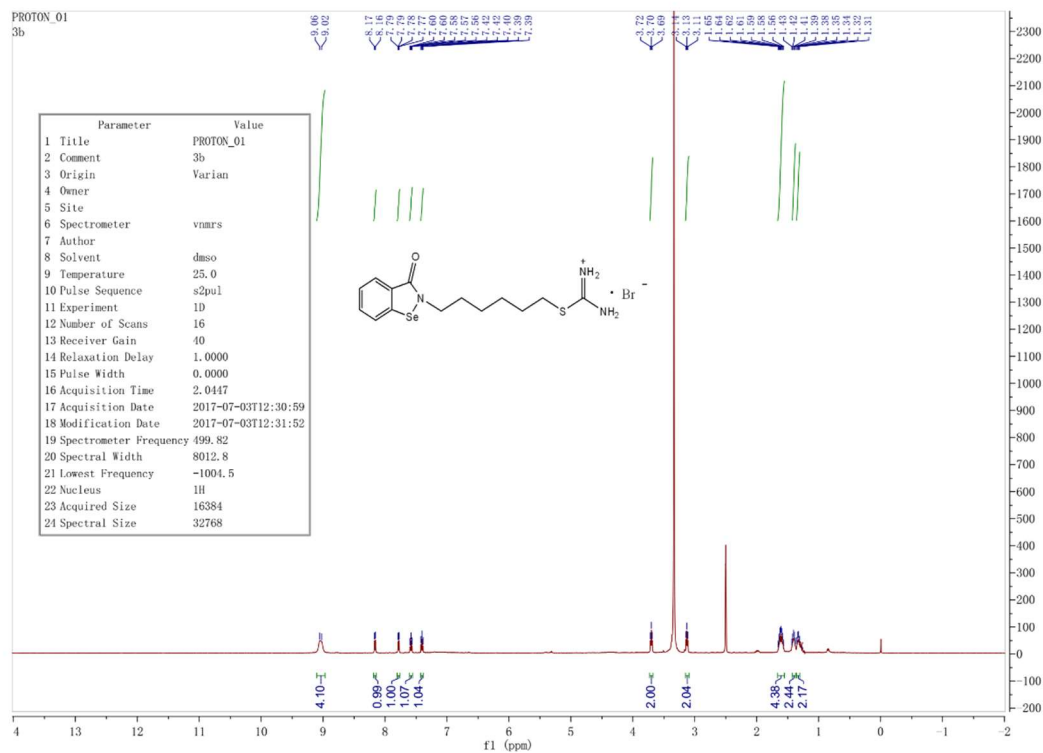

**Fig. S13.**  $^1\text{H}$  NMR Spectrum of **3b** in  $\text{DMSO-}d_6$  (500 MHz)

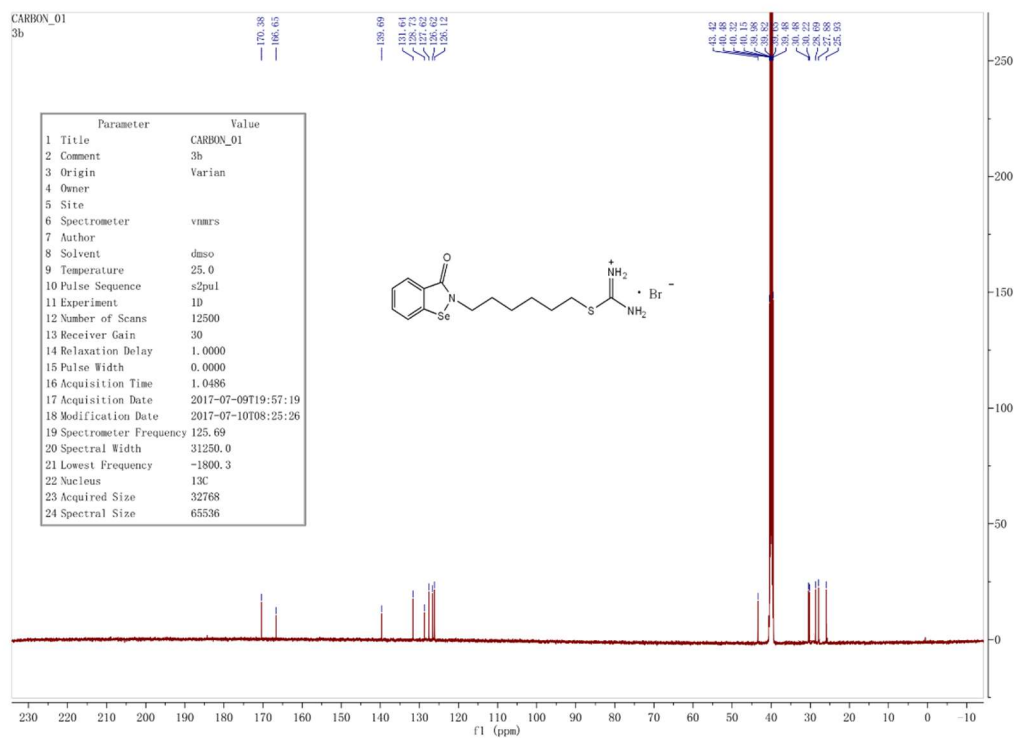

**Fig. S14.**  $^{13}\text{C}$  NMR Spectrum of **3b** in  $\text{DMSO-}d_6$  (126 MHz)



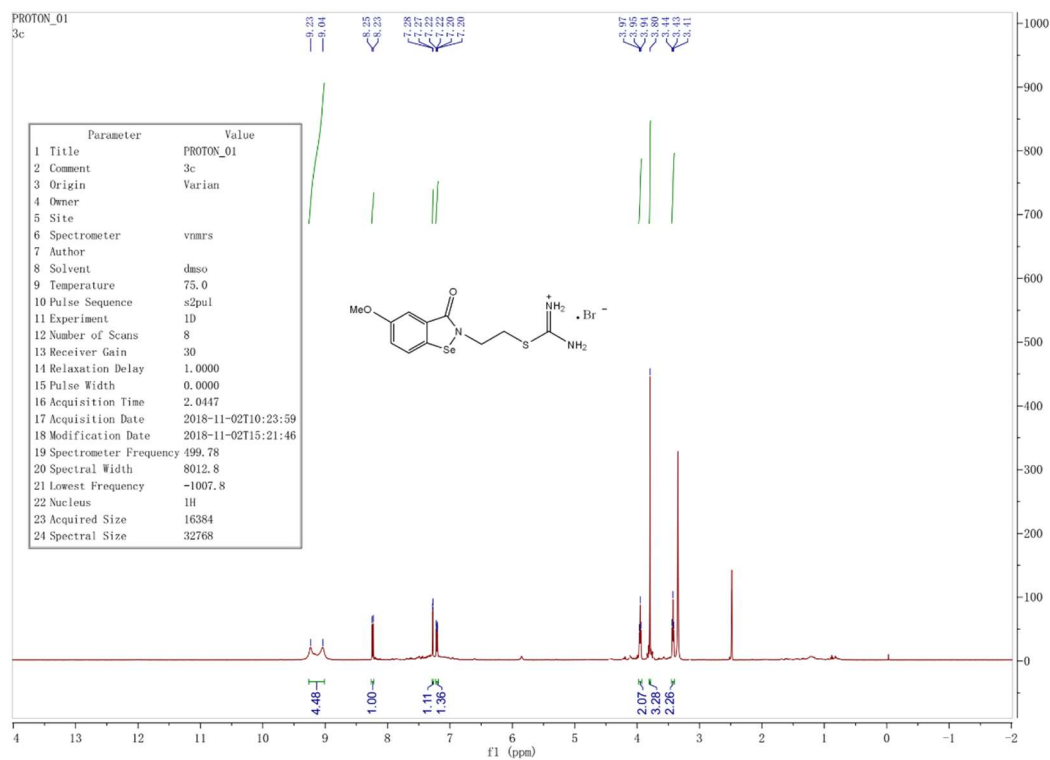

**Fig. S15.**  $^1\text{H}$  NMR Spectrum of **3c** in  $\text{DMSO-}d_6$  (500 MHz)

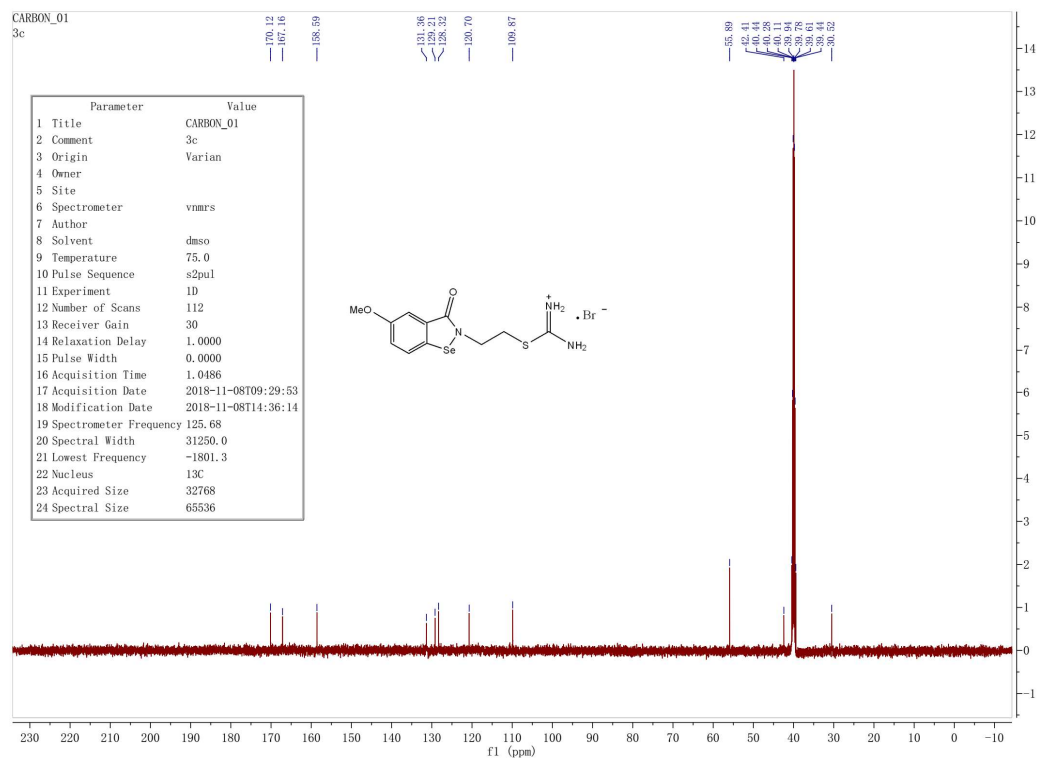

**Fig. S16.**  $^{13}\text{C}$  NMR Spectrum of **3c** in  $\text{DMSO-}d_6$  (126 MHz)

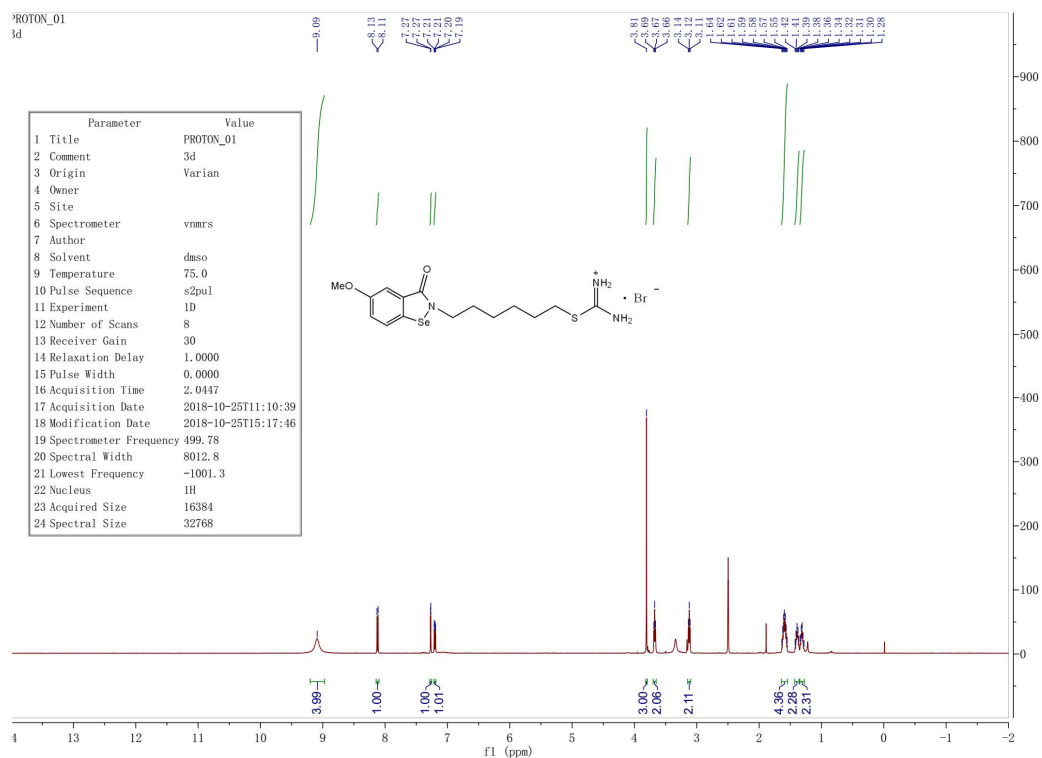

Fig. S17.  $^1\text{H}$  NMR Spectrum of **3d** in  $\text{DMSO-}d_6$  (500 MHz)

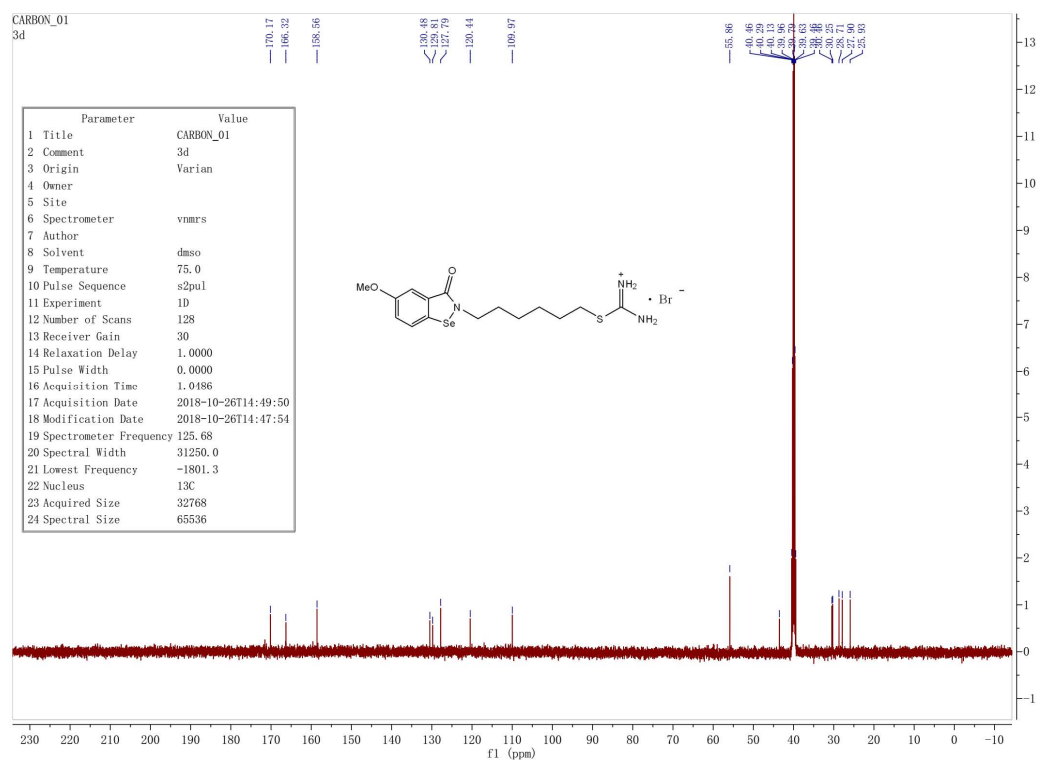

Fig. S18.  $^{13}\text{C}$  NMR Spectrum of **3d** in  $\text{DMSO-}d_6$  (126 MHz)

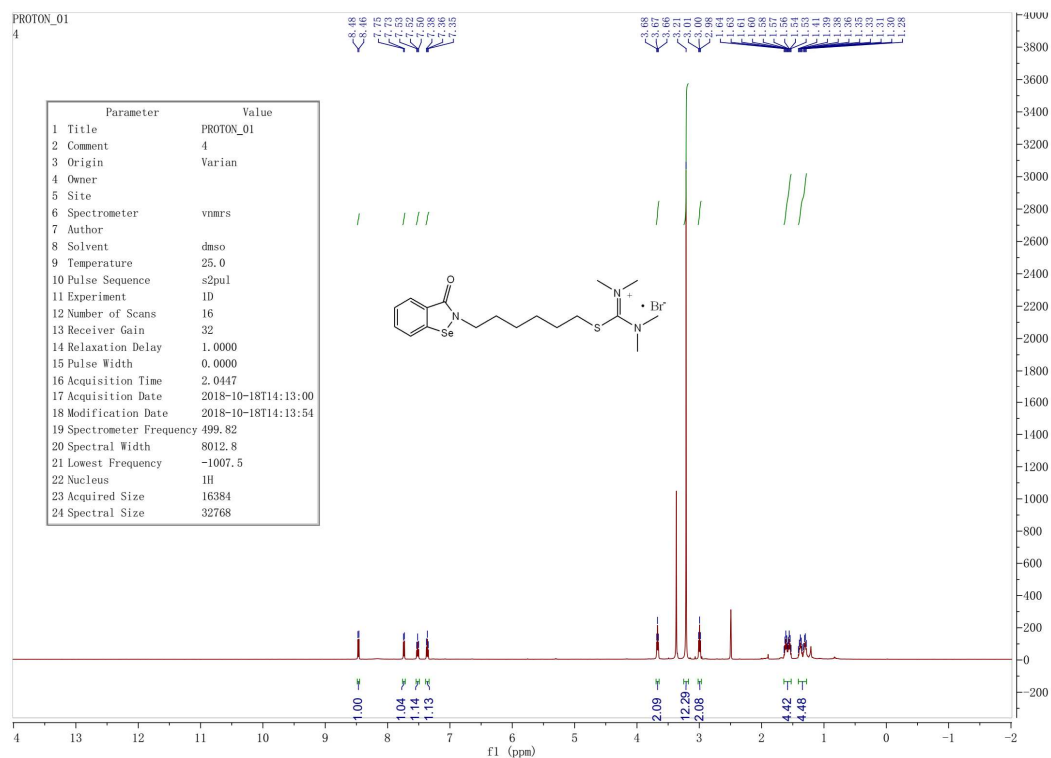

Fig. S19.  $^1\text{H}$  NMR Spectrum of 4 in  $\text{DMSO-}d_6$  (500 MHz)

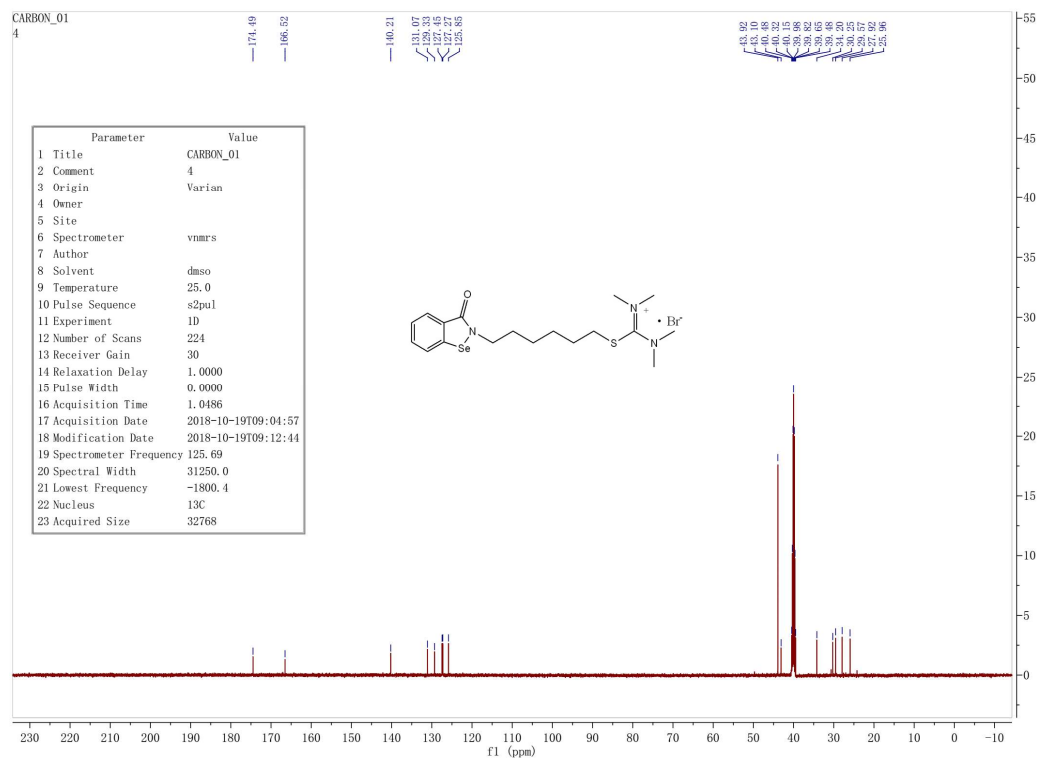

Fig. S20.  $^{13}\text{C}$  NMR Spectrum of 4 in  $\text{DMSO-}d_6$  (126 MHz)

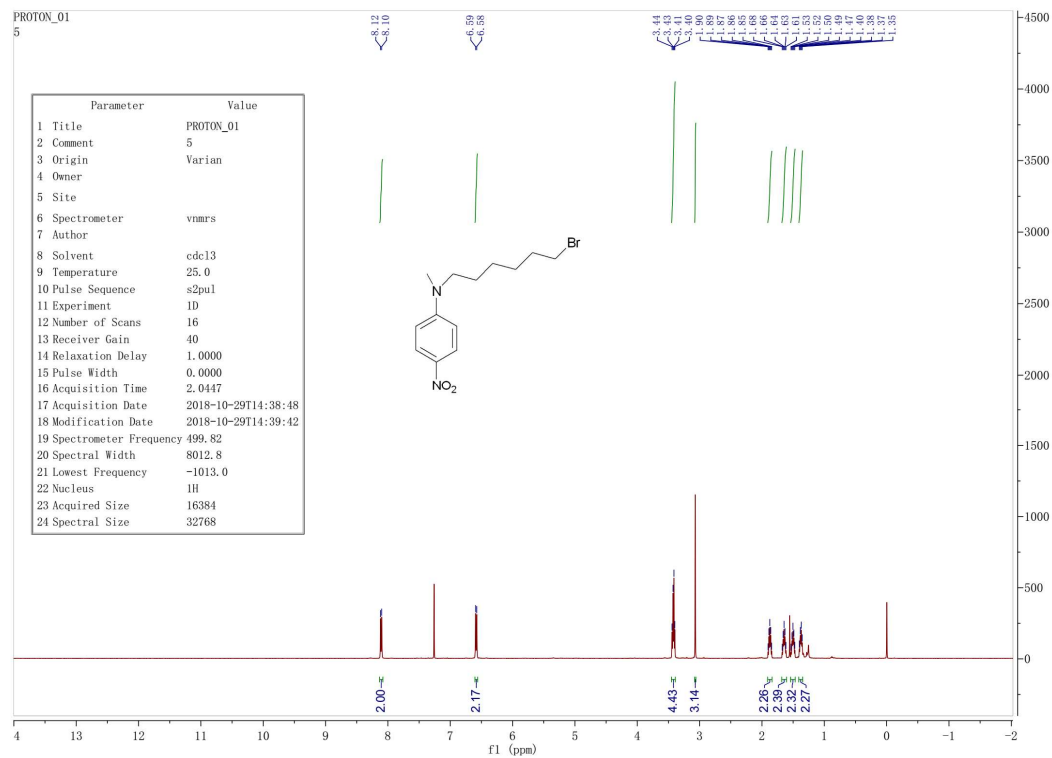

Fig. S21.  $^1\text{H}$  NMR Spectrum of **5** in  $\text{CDCl}_3$  (500 MHz)

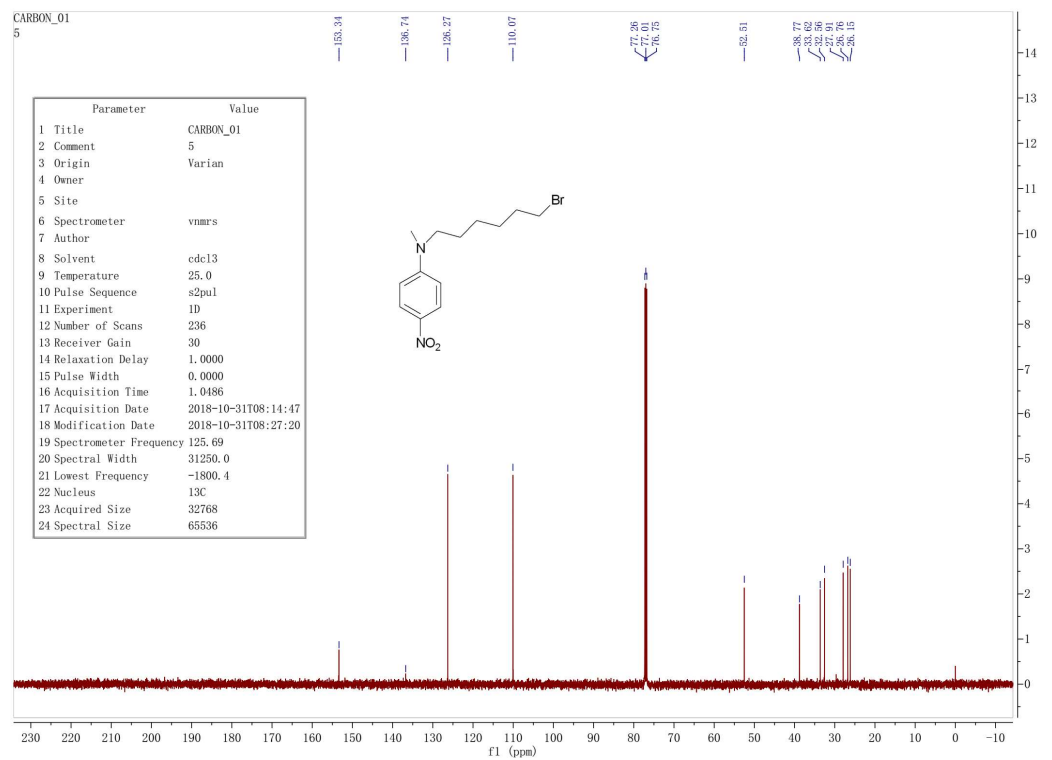

Fig. S22.  $^{13}\text{C}$  NMR Spectrum of **5** in  $\text{CDCl}_3$  (126 MHz)

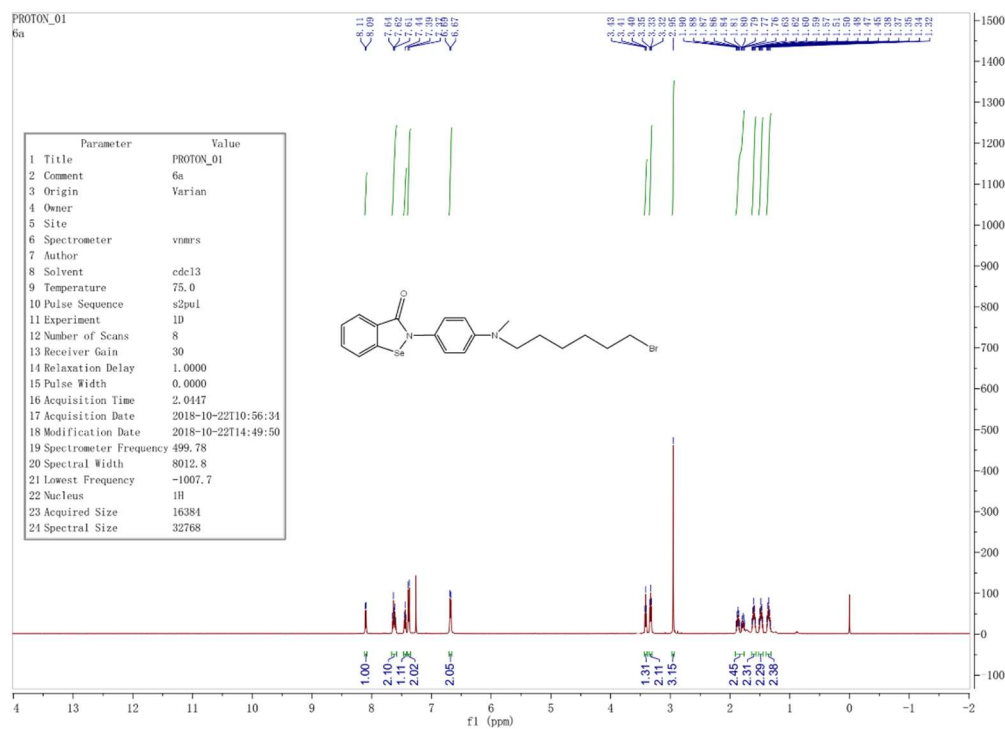

Fig. S23.  $^1\text{H}$  NMR Spectrum of **6a** in  $\text{CDCl}_3$  (500 MHz)

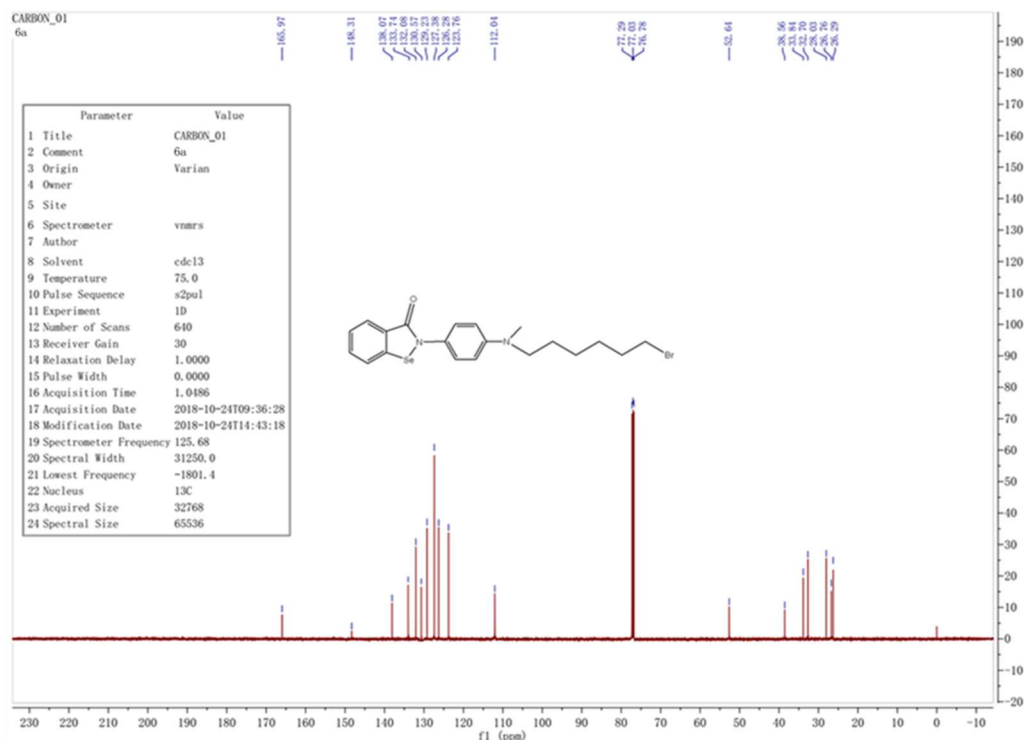

Fig. S24.  $^{13}\text{C}$  NMR Spectrum of **6a** in  $\text{CDCl}_3$  (126 MHz)

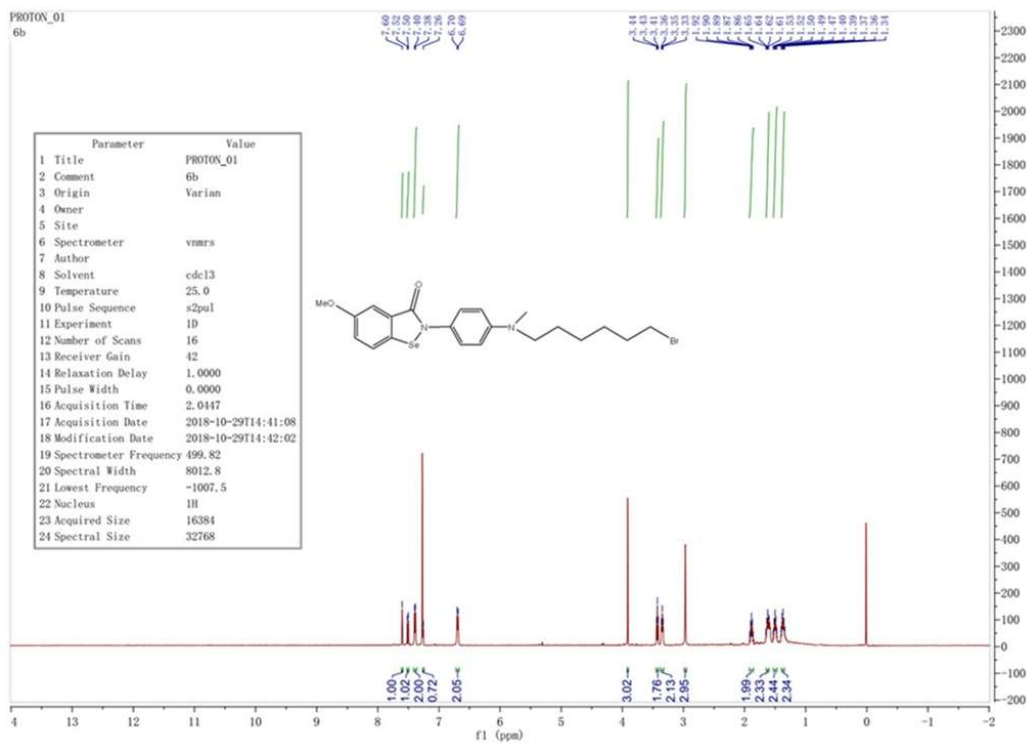

Fig. S25.  $^1\text{H}$  NMR Spectrum of **6b** in  $\text{CDCl}_3$  (500 MHz)

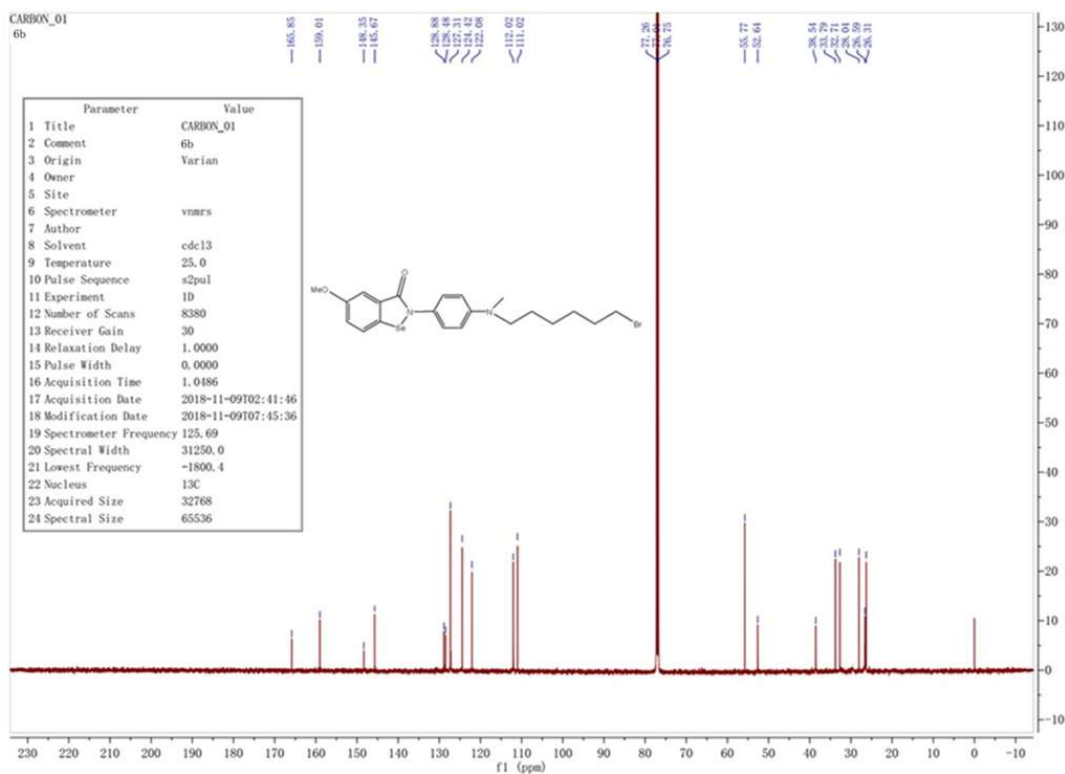

Fig. S26.  $^{13}\text{C}$  NMR Spectrum of **6b** in  $\text{CDCl}_3$  (126 MHz)

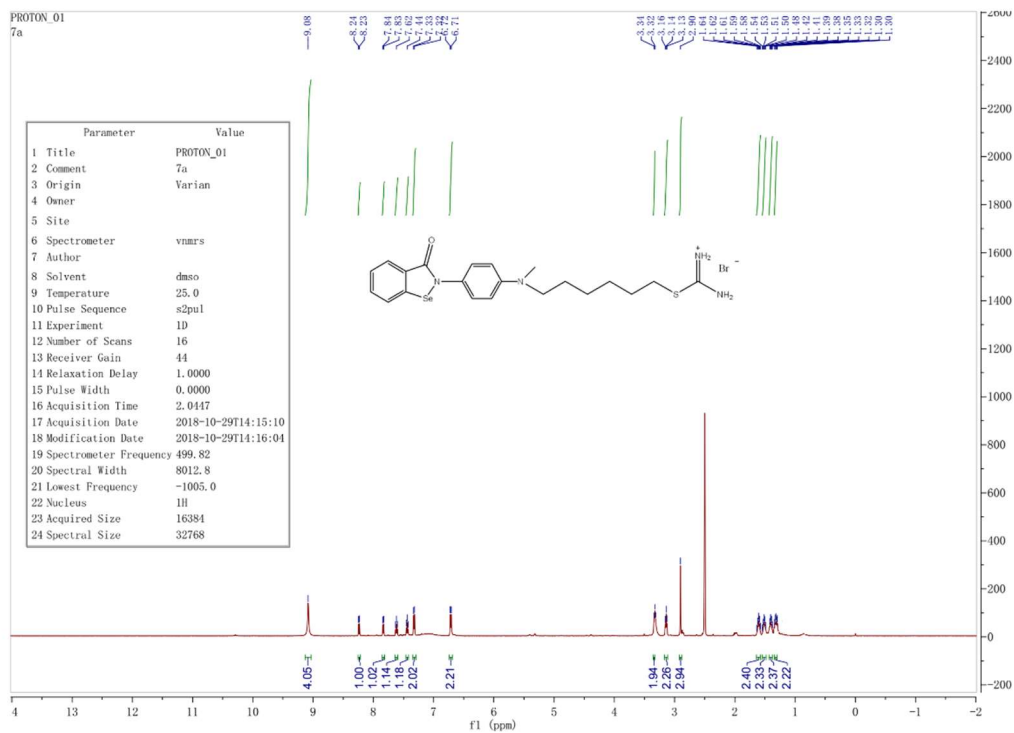

**Fig. S27.**  $^1\text{H}$  NMR Spectrum of **7a** in  $\text{DMSO-}d_6$  (500 MHz)

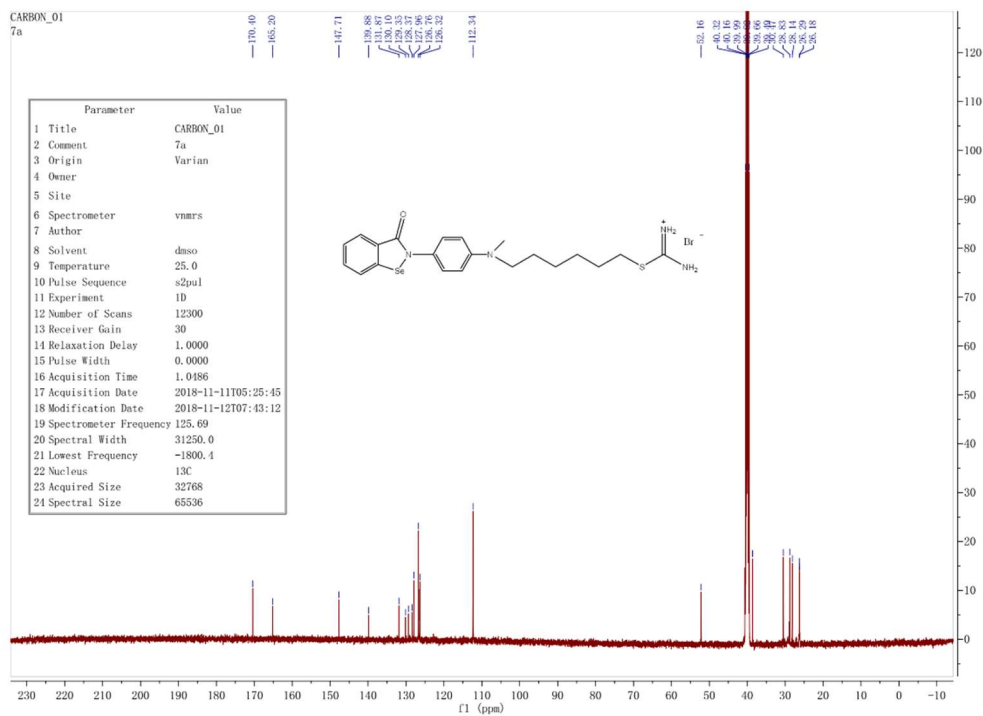

**Fig. S28.**  $^{13}\text{C}$  NMR Spectrum of **7a** in  $\text{DMSO-}d_6$  (126 MHz)

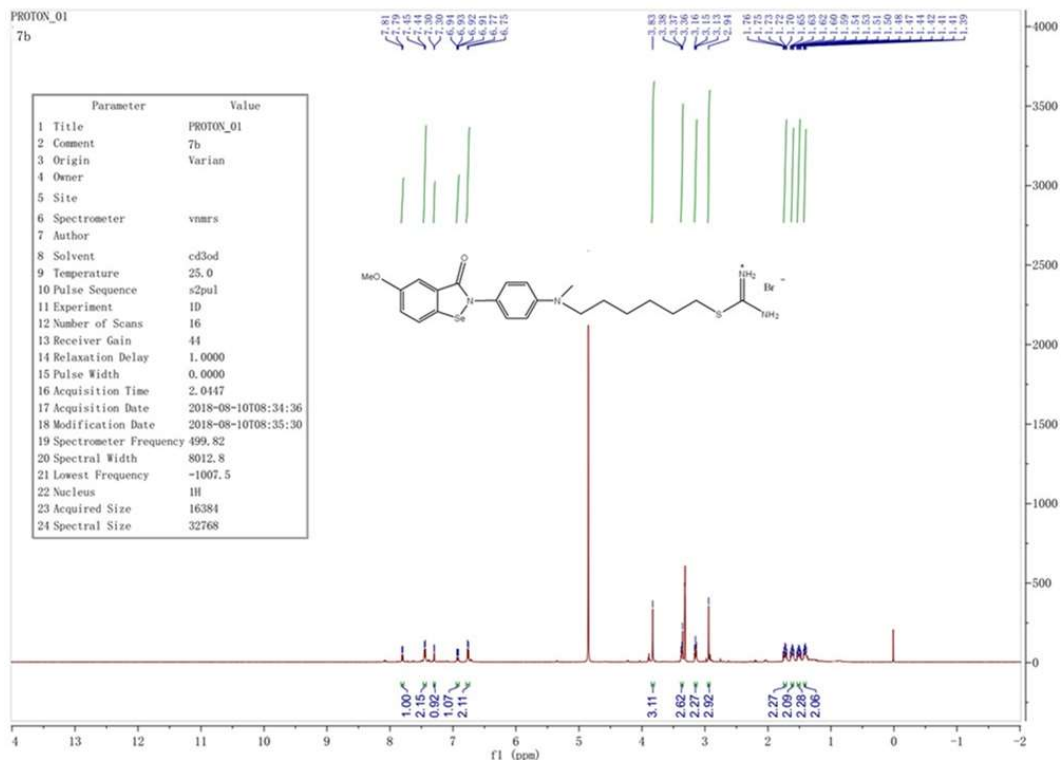

Fig. S29.  $^1\text{H}$  NMR Spectrum of 7b in  $\text{CD}_3\text{OD}$  (500 MHz)

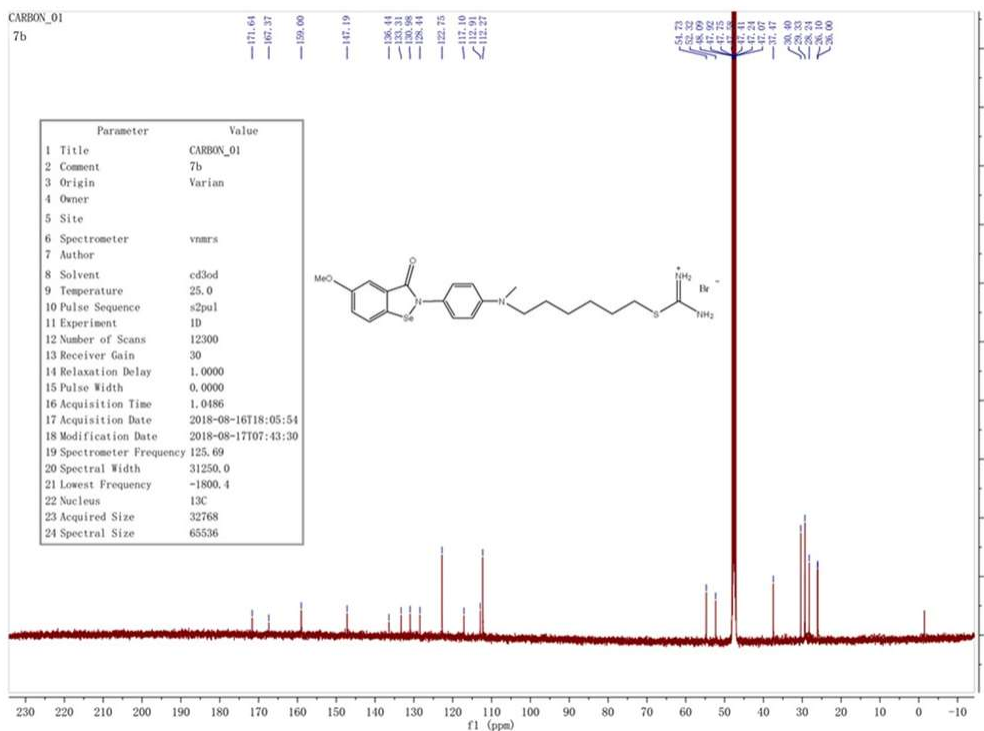

Fig. S30.  $^{13}\text{C}$  NMR Spectrum of 7b in  $\text{CD}_3\text{OD}$  (126 MHz)



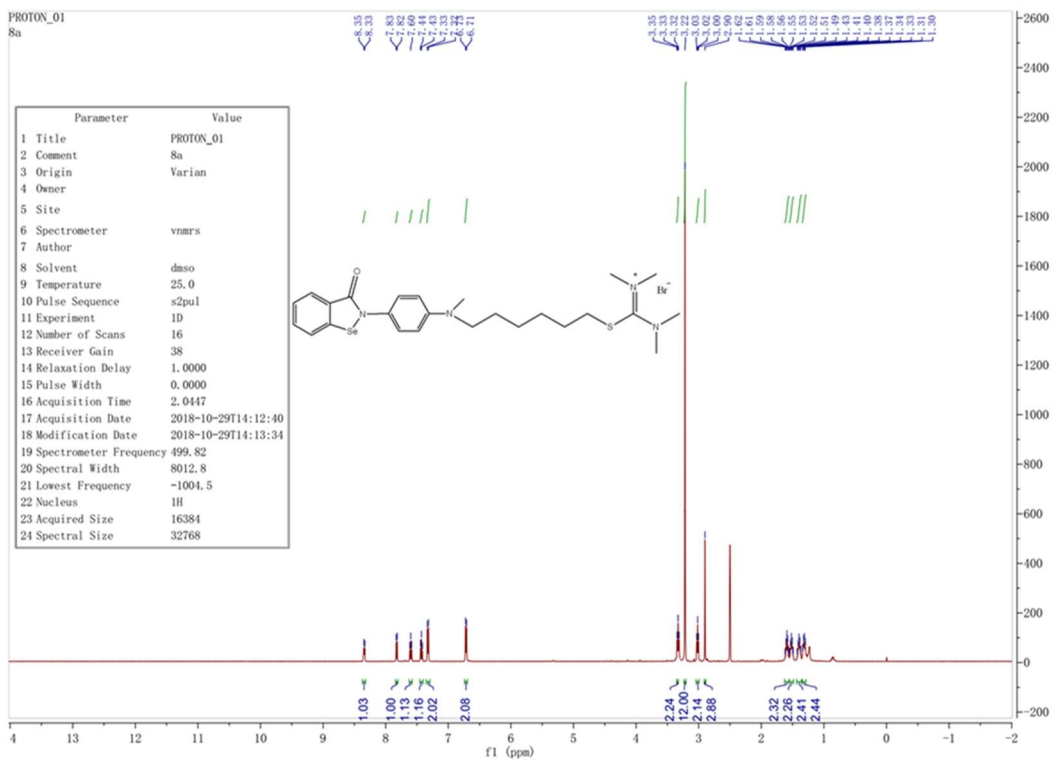

**Fig. S31.**  $^1\text{H}$  NMR Spectrum of **8a** in  $\text{DMSO-}d_6$  (500 MHz)

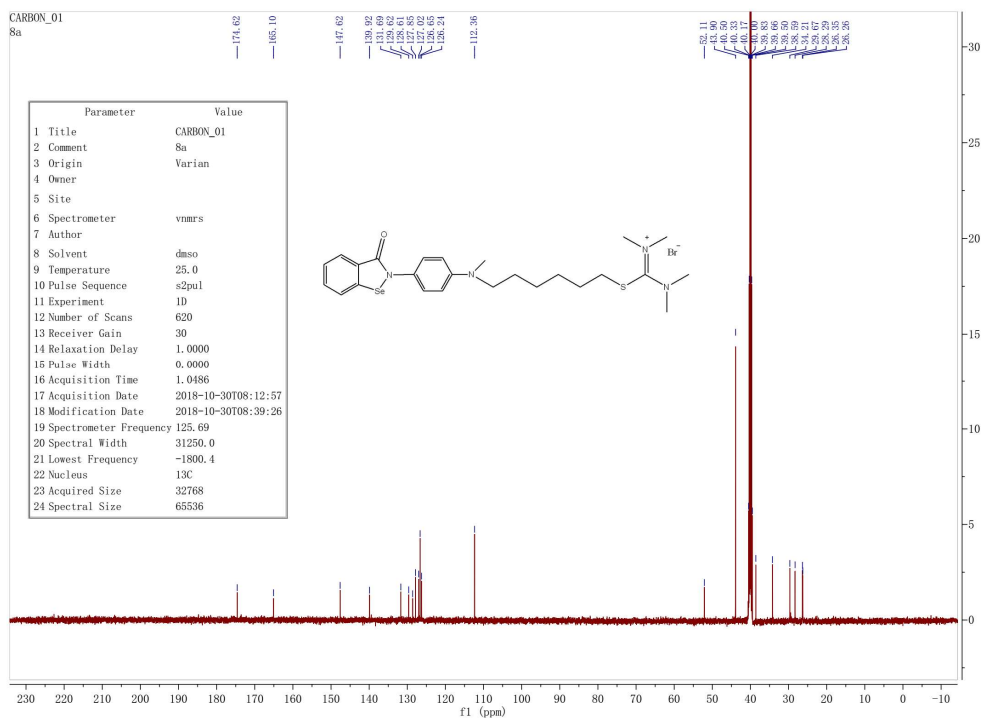

**Fig. S32.**  $^{13}\text{C}$  NMR Spectrum of **8a** in  $\text{DMSO-}d_6$  (126 MHz)

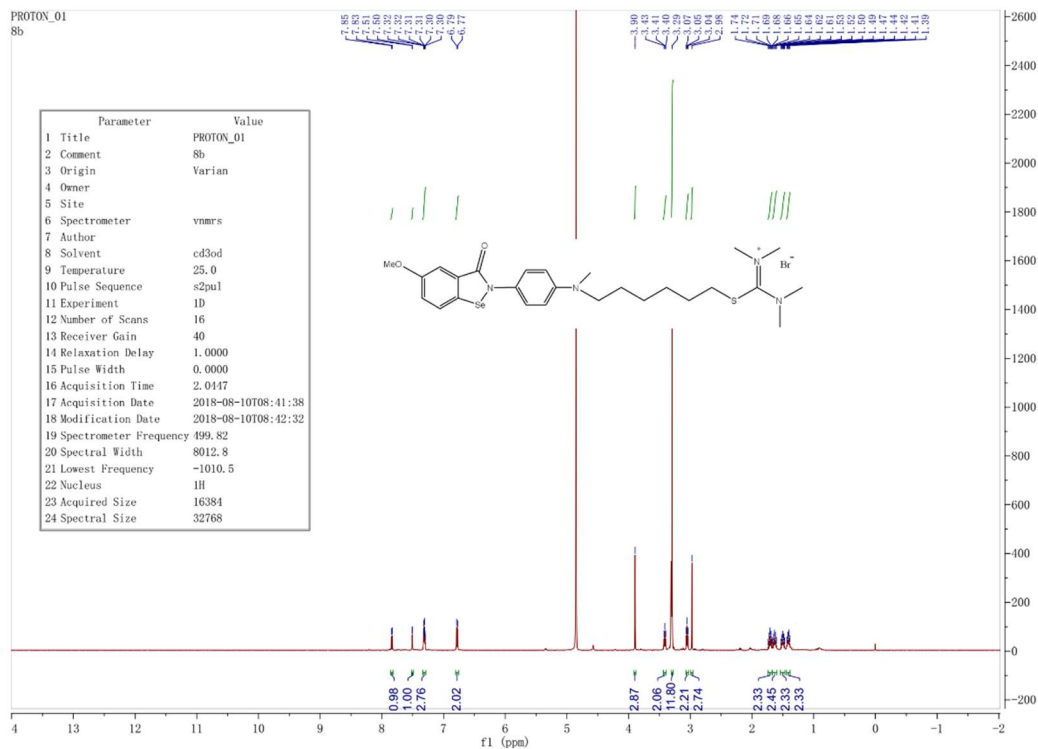

**Fig. S33.**  $^1\text{H}$  NMR Spectrum of **8b** in  $\text{CD}_3\text{OD}$  (500 MHz)

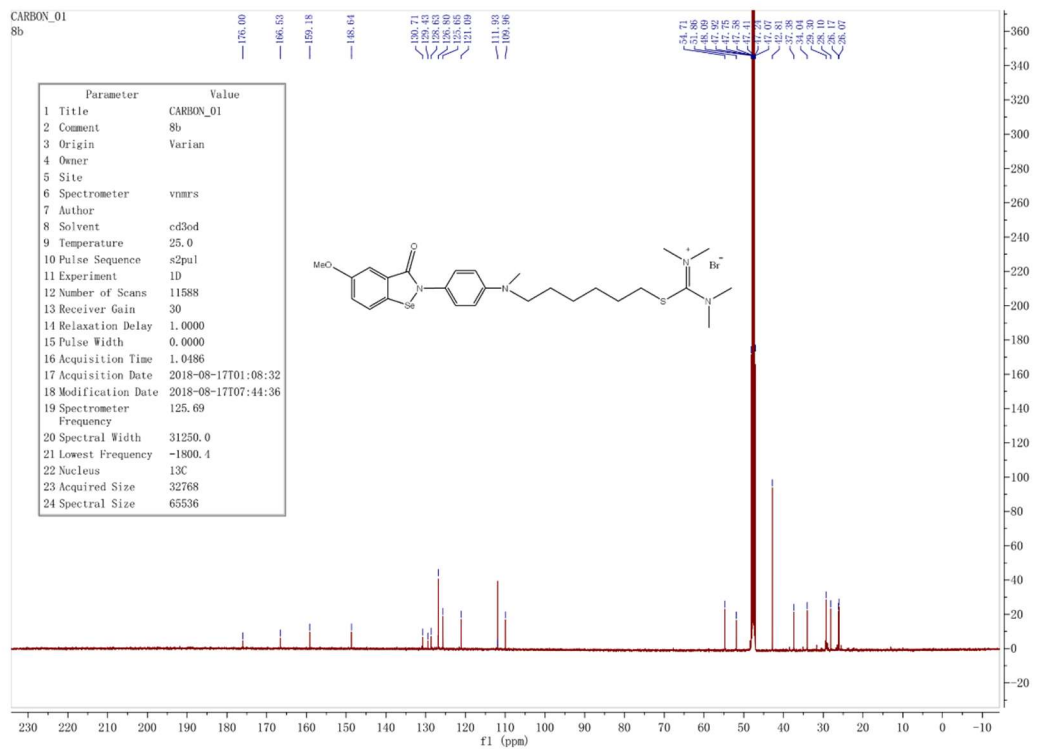

**Fig. S34.**  $^{13}\text{C}$  NMR Spectrum of **8b** in  $\text{CD}_3\text{OD}$  (126 MHz)





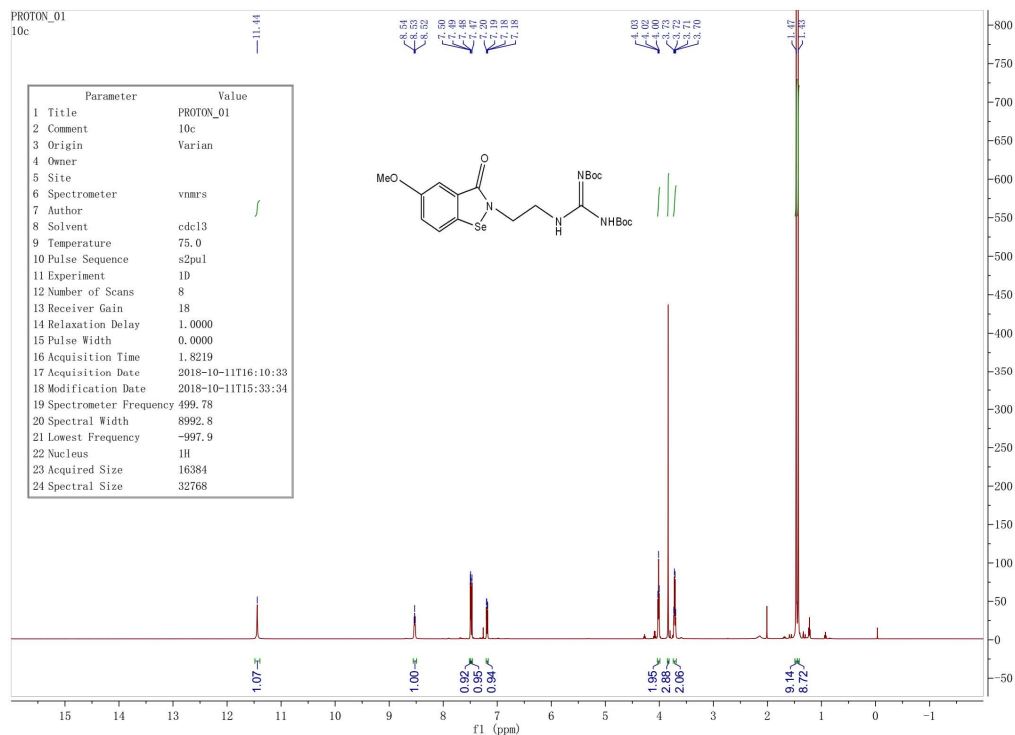

Fig. S39.  $^1\text{H}$  NMR Spectrum of 10c in  $\text{CDCl}_3$  (500 MHz)

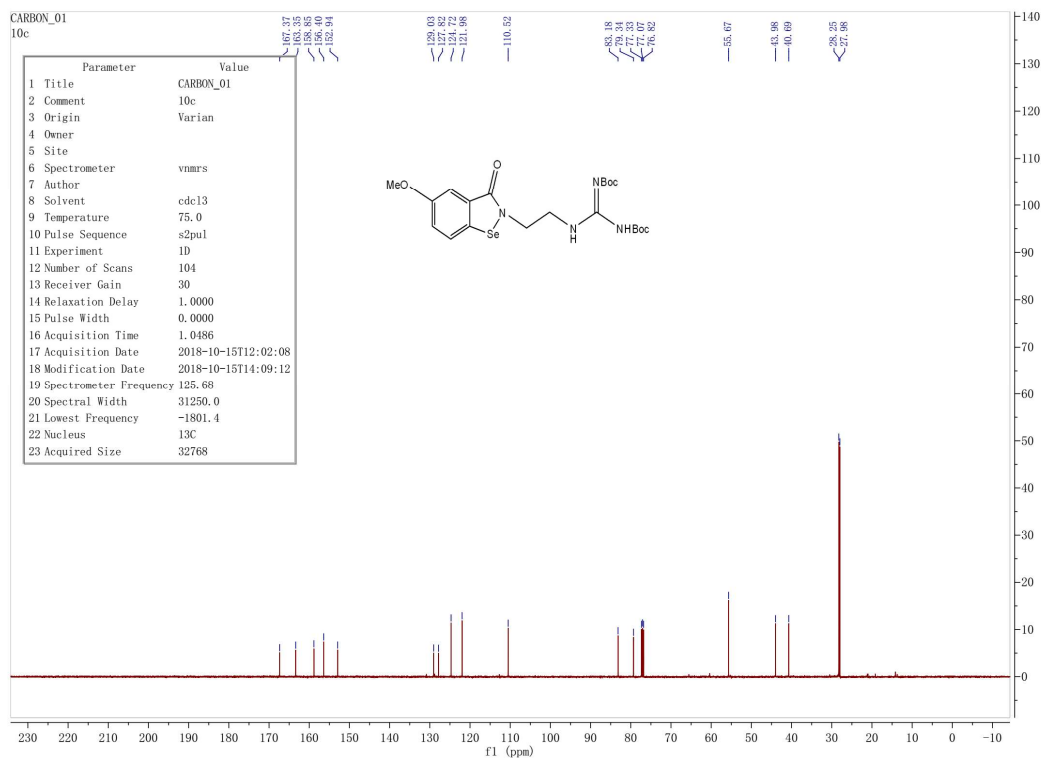

Fig. S40.  $^{13}\text{C}$  NMR Spectrum of 10c in  $\text{CDCl}_3$  (126 MHz)



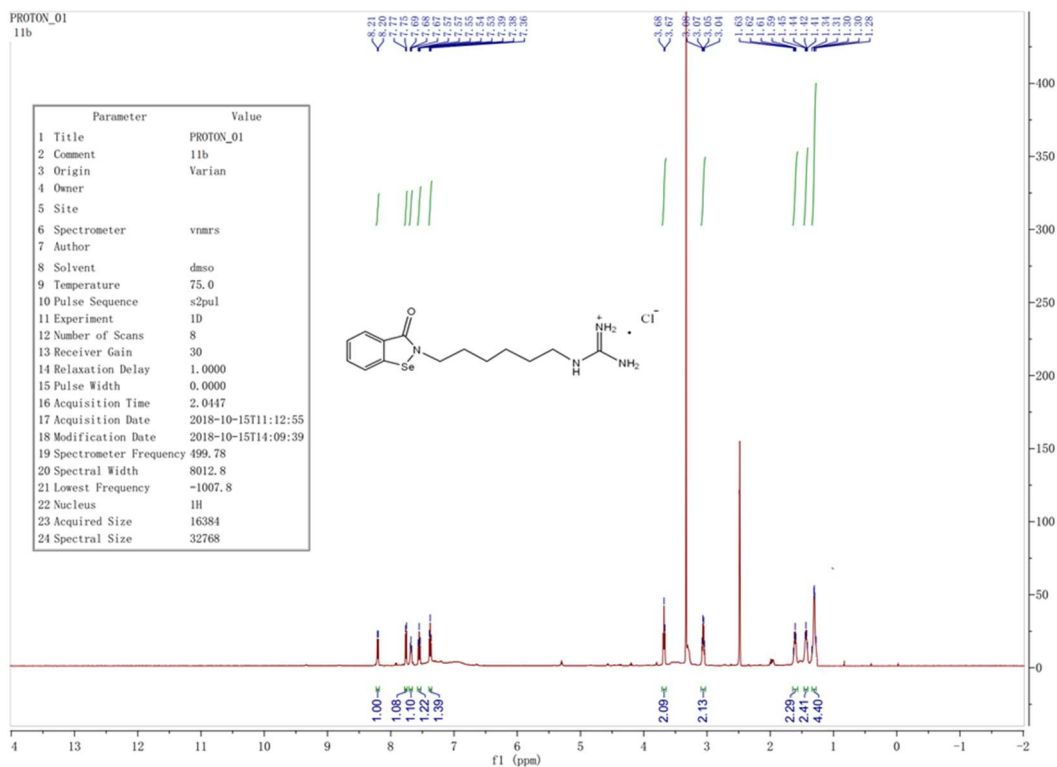

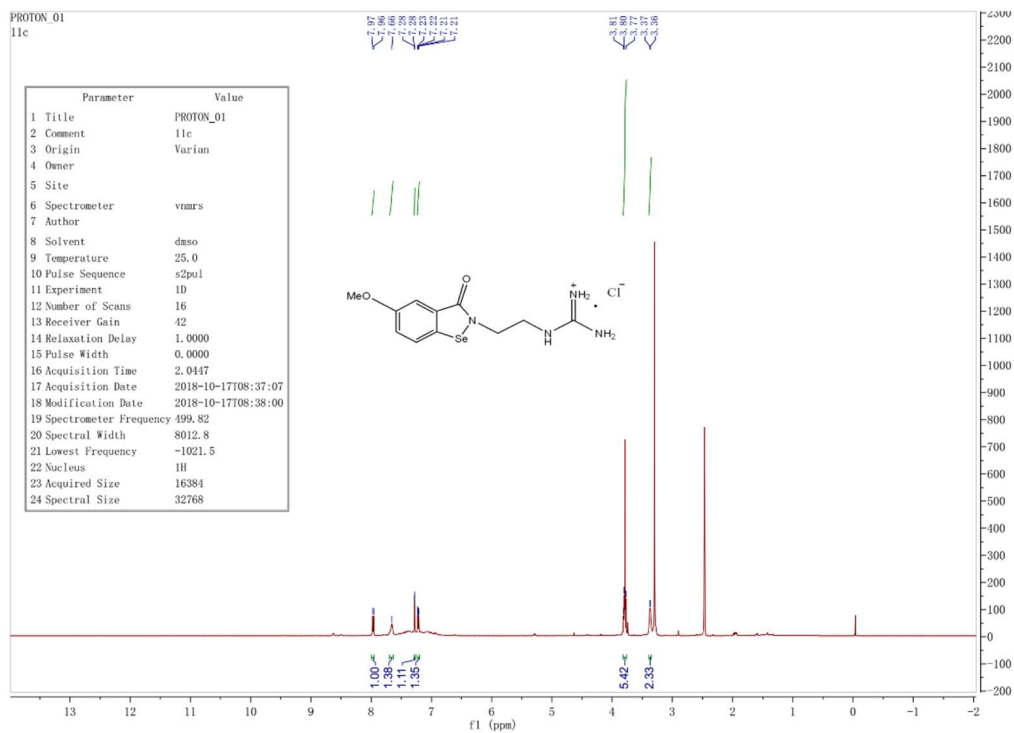

Fig. S45.  $^1\text{H}$  NMR Spectrum of 11c in  $\text{DMSO-}d_6$  (500 MHz)

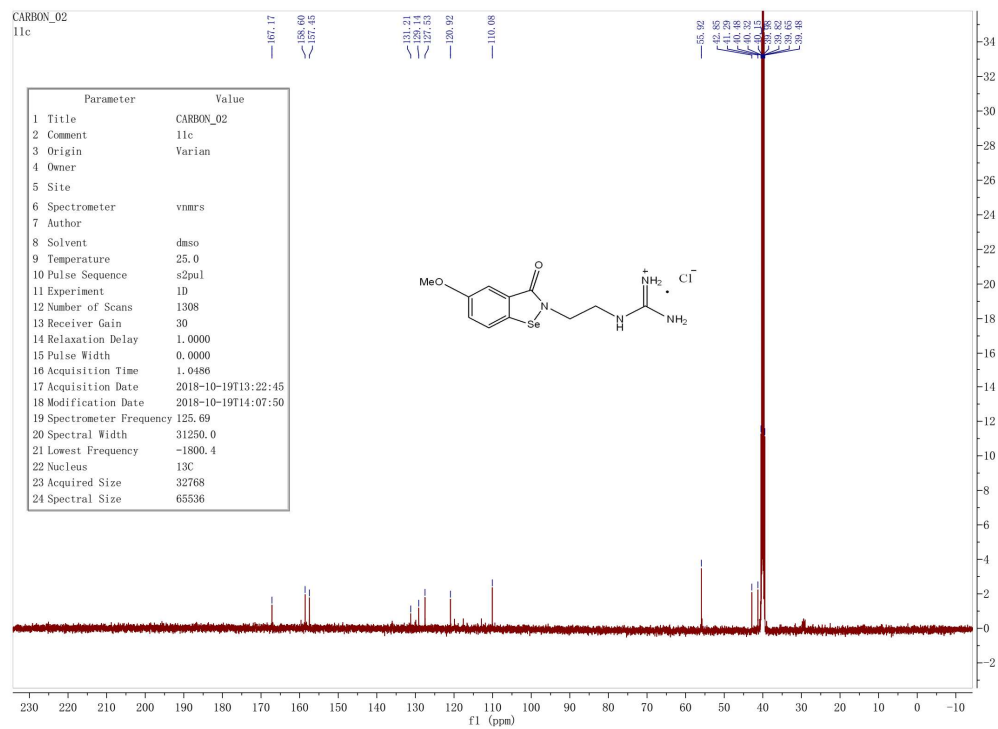

Fig. S46.  $^{13}\text{C}$  NMR Spectrum of 11c in  $\text{DMSO-}d_6$  (126 MHz)



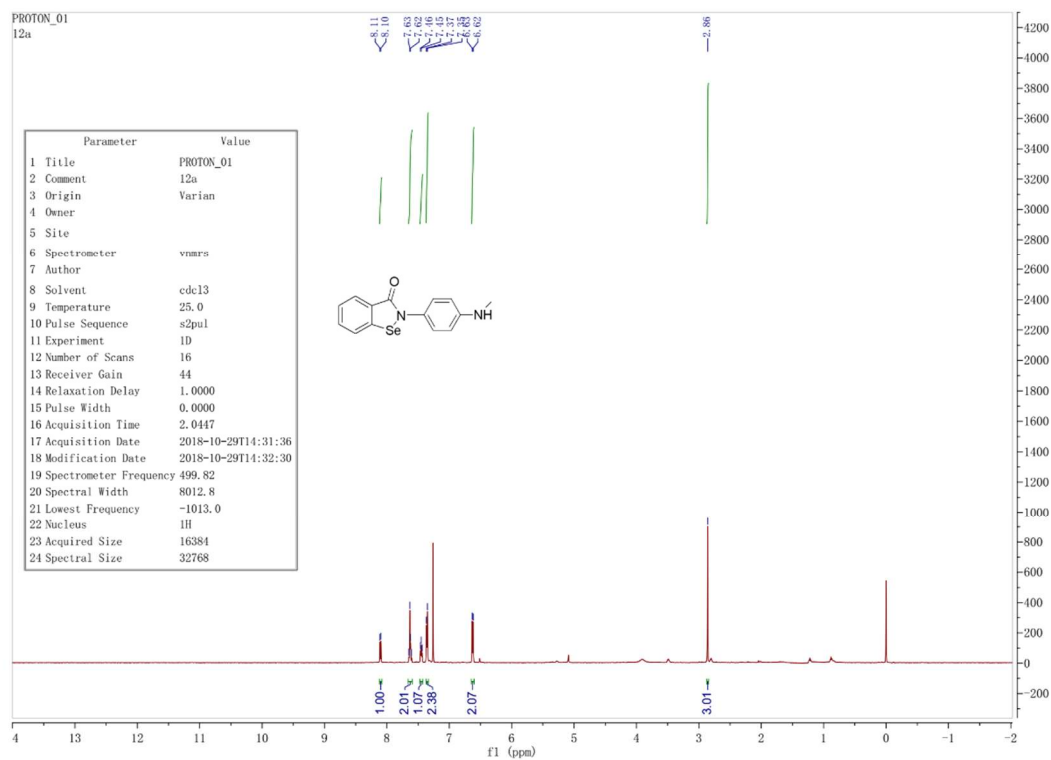

Fig. S47.  $^1\text{H}$  NMR Spectrum of 12a in  $\text{CDCl}_3$  (500 MHz)

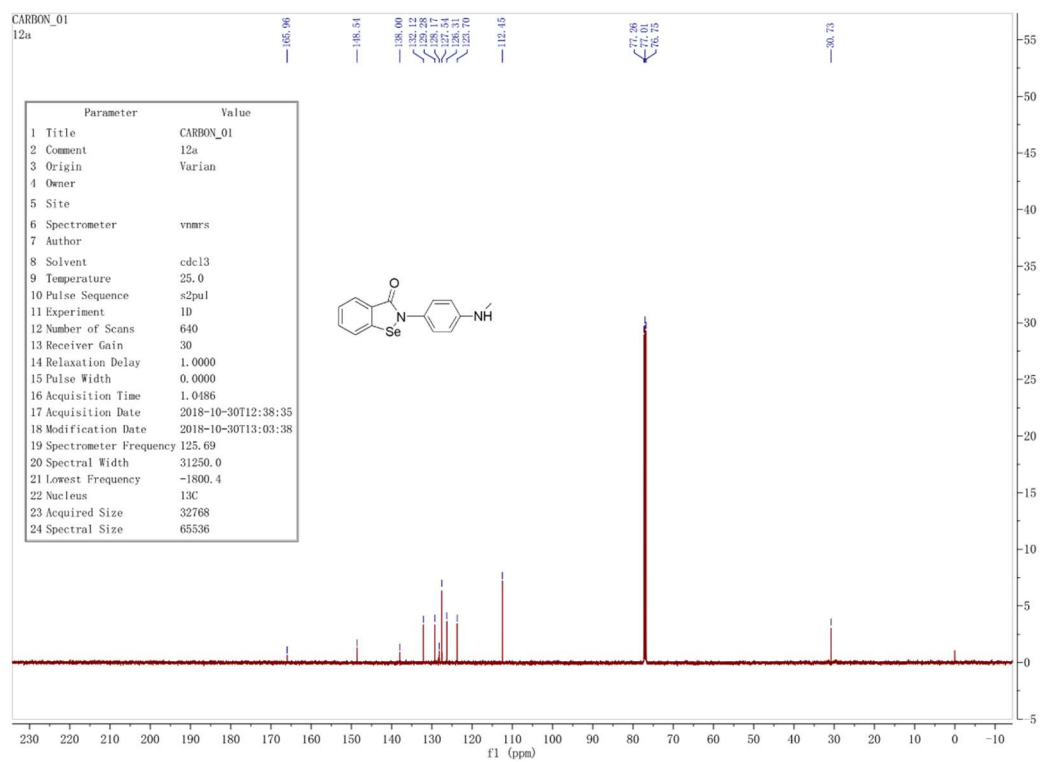

Fig. S48.  $^{13}\text{C}$  NMR Spectrum of 12a in  $\text{CDCl}_3$  (126 MHz)

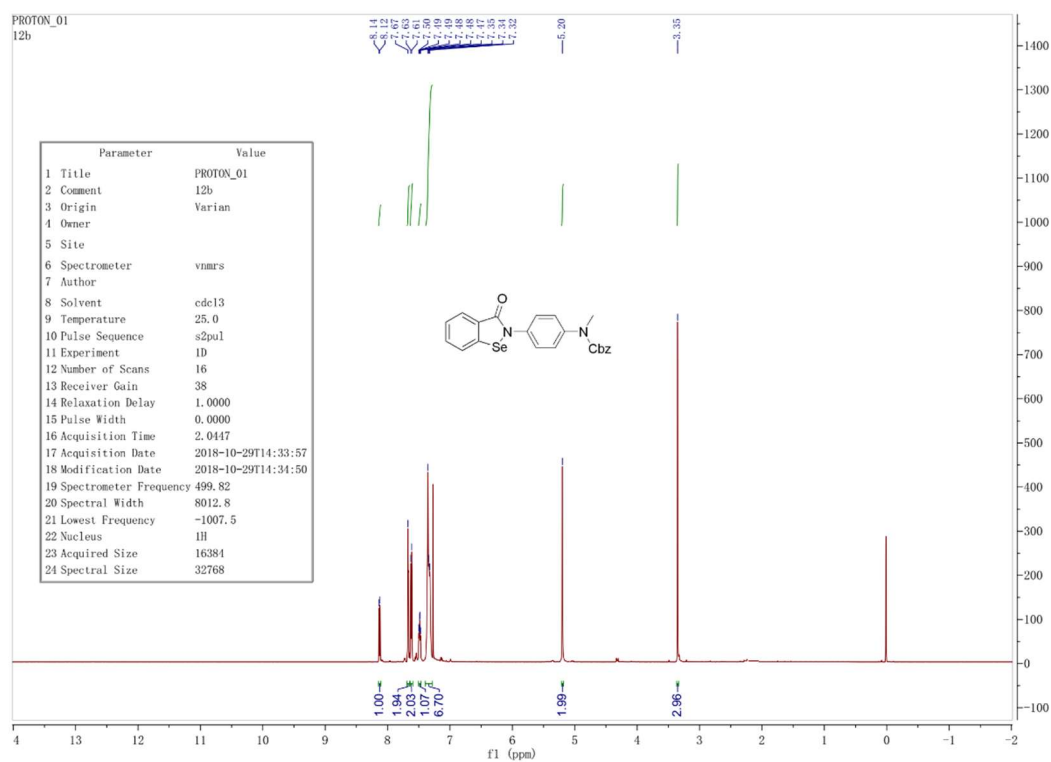

**Fig. S49.**  $^1\text{H}$  NMR Spectrum of **12b** in  $\text{CDCl}_3$  (500 MHz)

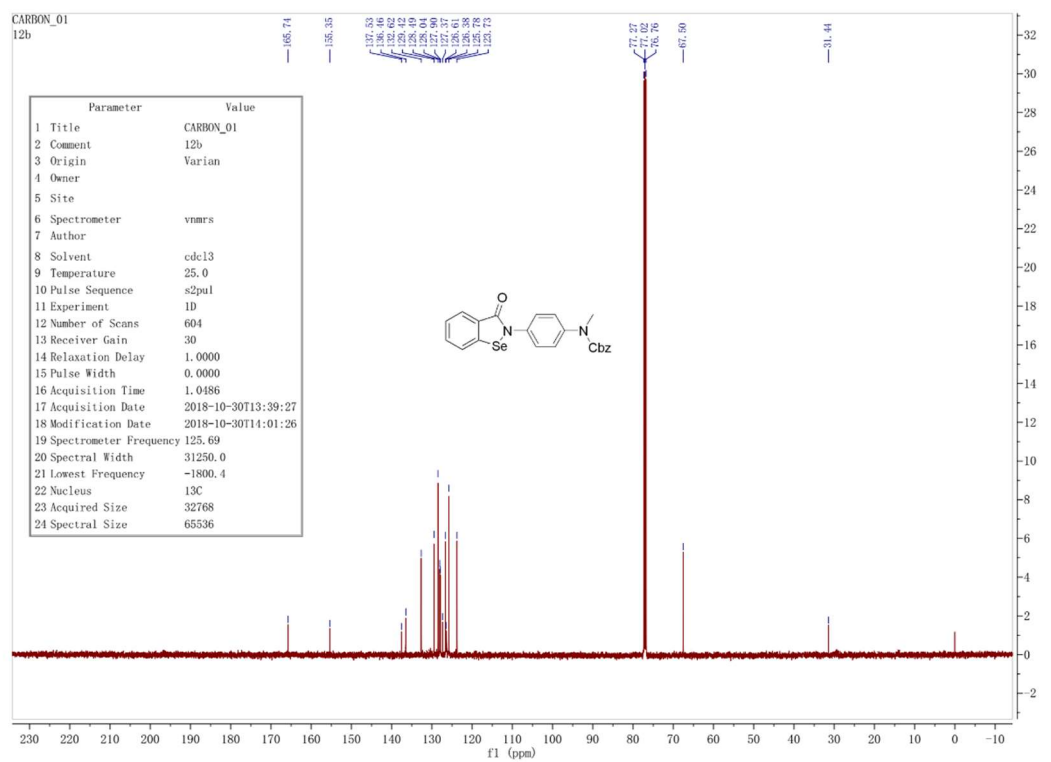

**Fig. S50.**  $^{13}\text{C}$  NMR Spectrum of **12b** in  $\text{CDCl}_3$  (126 MHz)



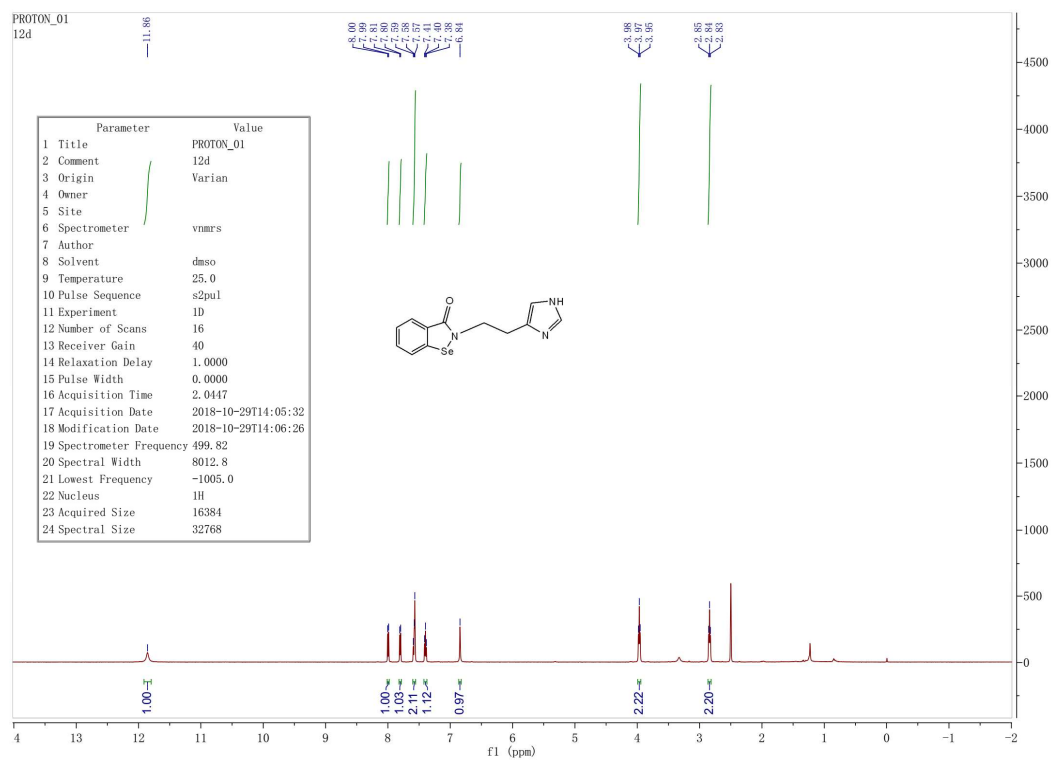

Fig. S53.  $^1\text{H}$  NMR Spectrum of 12d in  $\text{DMSO-}d_6$  (500 MHz)

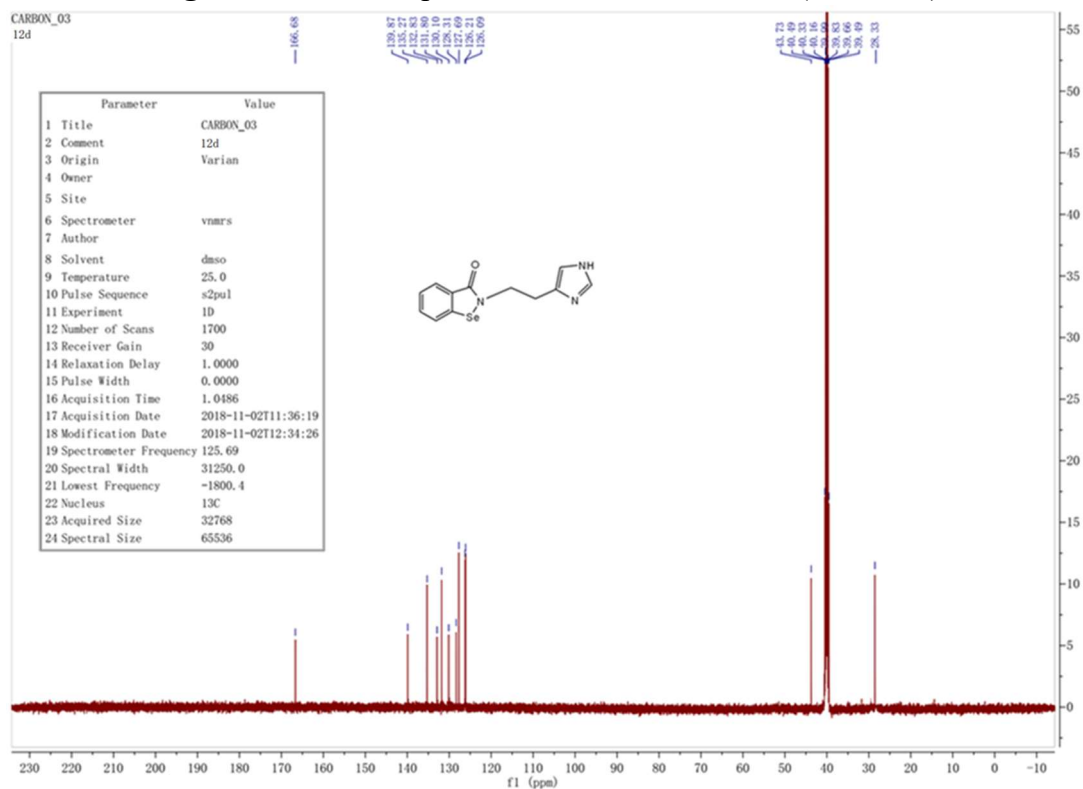

Fig. S54.  $^{13}\text{C}$  NMR Spectrum of 12d in  $\text{DMSO-}d_6$  (126 MHz)
